# Supplementary material for: Phylogenomic and Molecular Demarcation of the Core Members of the PolyphyleticPasteurellaceaeGeneraActinobacillus,Haemophilus, andPasteurella
Source: Hindawi journal article supplement (doi:10.1155/2015/198560), 2015-01-01
Supplement: f1 [file 198560.f1.pdf]

|                                                          |                                              |           |                      |                   |                          |
|----------------------------------------------------------|----------------------------------------------|-----------|----------------------|-------------------|--------------------------|
|                                                          |                                              |           | 368                  |                   | 412                      |
|                                                          |                                              |           | WLRKLLAWQNDIADSGEIMA | A                 | EMRSQVFDDRYYVFTPKGEVIDLP |
| <i>Actinobacillus</i><br><i>sensu stricto</i>            | Act pleuropneumonia ser. 5b str. L20         | 126207889 | -----D--T---V--      | -L-----V--        |                          |
|                                                          | Act pleuropneumoniae ser 6 str. Femo         | 306860648 | -----D--T---V--      | -----R-----       |                          |
|                                                          | Act pleuropneumonia ser. 5b str. 5b str. L20 | 126096681 | -----D--T---V--      | -----R-----       |                          |
|                                                          | Act pleuropneumoniae ser 2 str. 4226         | 302648616 | -----D--T---V--      | -----R-----       |                          |
|                                                          | Act pleuropneumoniae ser 2 str. S1536        | 306856105 | -----D--T---V--      | -----R-----       |                          |
|                                                          | Act pleuropneumoniae ser 4 str. M62          | 306858326 | -----D--T---V--      | -----R-----       |                          |
|                                                          | Act pleuropneumoniae ser 10 str. D13039      | 306865081 | -----D--T---V--      | -----R-----       |                          |
|                                                          | Act pleuropneumoniae ser 12 str. 1096        | 306869447 | -----D--T---V--      | -----R-----       |                          |
|                                                          | Act pleuropneumoniae ser 13 str. N273        | 306871633 | -----D--T---V--      | -----R-----       |                          |
|                                                          | Act pleuropneumoniae ser 1 str. 4074         | 306853881 | -----D--T---V--      | -----R-----       |                          |
|                                                          | Act pleuropneumoniae ser 9 str. CVJ13261     | 306862884 | -----D--T---V--      | -----R-----       |                          |
|                                                          | Act pleuropneumoniae ser 11 str. 56153       | 306867306 | -----D--T---V--      | -----R-----       |                          |
|                                                          | Act pleuropneumonia ser. 7 str. AP76         | 190149698 | -----D--T---V--      | -S-----           |                          |
|                                                          | Pasteurella pneumotropica                    | 517167434 | -----D--T---V--      | -L-----V--        |                          |
|                                                          | Actinobacillus capsulatus                    | 517481243 | -----D--T---V--      | -----R-----       |                          |
| Other<br><i>Pasteurellales</i>                           | Avibacterium paragallinarum                  | 545595425 | -----D--T---S-VI-    | -L-----           |                          |
|                                                          | Actinobacillus suis H91-0380                 | 407692614 | -----D--T---V--      | -----R-----       |                          |
|                                                          | Actinobacillus ureae                         | 491834566 | -----D--T---V--      | -----R-----       |                          |
|                                                          | Actinobacillus minor                         | 492371309 | -----D--T---V--      | -----V--          |                          |
|                                                          | Actinobacillus succinogenes 13               | 152977877 | -----A-----G-VG      | ---T-I-----V--    |                          |
|                                                          | Mannheimia succiniciproducens                | 52424296  | -----H--SN--VVP      | -L-T-----V--      |                          |
|                                                          | Pasteurella bettyae                          | 492134420 | -----H--S-A--VVP     | -L-T-----Q--      |                          |
|                                                          | Pasteurella multocida 36950                  | 378775075 | -----D--T---V--      | -----             |                          |
|                                                          | Pasteurella multocida subsp. m               | 15603730  | -----D--T---V--      | -----             |                          |
|                                                          | Pasteurella dagmatis                         | 492150615 | -----D--T---V--      | -----             |                          |
|                                                          | Mannheimia haemolytica USDA-AR               | 472334407 | -----E----L---DMV-   | -----I-----R----- |                          |
|                                                          | Bibersteinia trehalosi USDA-AR               | 470167385 | -----D--T---V--      | -----             |                          |
|                                                          | Haemophilus ducreyi 35000HP                  | 33152293  | -----L--V--SDM--     | D----I-----R----- |                          |
|                                                          | Haemophilus sputorum                         | 494789823 | -----D--T---V--      | -----V--          |                          |
|                                                          | Haemophilus parahaemolyticus                 | 491987266 | -----D--T---V--      | -----R-----       |                          |
|                                                          | Haemophilus paraphrohaemolytic               | 491989861 | -----D--T---V--      | -----R-----       |                          |
|                                                          | Haemophilus parasuis SH0165                  | 219870950 | -----D--K---D--V--   | -----V--          |                          |
|                                                          | Haemophilus somnus 129PT                     | 113460244 | -----D--T---V--      | -----V--          |                          |
|                                                          | Haemophilus parainfluenzae T3T               | 345428882 | -----D--T---V--      | -L-----V--        |                          |
|                                                          | Haemophilus sp. oral taxon 851               | 497184571 | -----D--T---V--      | -L-----V--        |                          |
|                                                          | Haemophilus haemolyticus                     | 491876336 | -----D--T---V--      | -L-----V--        |                          |
|                                                          | Haemophilus influenzae R2846                 | 386265268 | -----D--T---V--      | -L-----V--        |                          |
|                                                          | Haemophilus influenzae 10810                 | 378696520 | -----D--T---V--      | -L-----V--        |                          |
|                                                          | Haemophilus influenzae Rd KW20               | 16272286  | -----D--T---VL-      | -L-----V--        |                          |
|                                                          | Haemophilus influenzae PittEE                | 148825382 | -----D--T---VL-      | -L-----V--        |                          |
|                                                          | Haemophilus influenzae 86-028N               | 68248939  | -----D--T---VL-      | -L-----V--        |                          |
|                                                          | Haemophilus influenzae F3047                 | 319775796 | -----D--T---VL-      | -L-----V--        |                          |
|                                                          | Haemophilus influenzae F3031                 | 319896667 | -----D--T---VL-      | -L-----V--        |                          |
|                                                          | Haemophilus influenzae PittGG                | 148827481 | -----D--T---KV--     | -L-----V--        |                          |
|                                                          | Haemophilus pittmaniae                       | 494450183 | -----D--T---VIE      | -L-----V--        |                          |
|                                                          | Haemophilus aegyptius                        | 494054052 | -----D--T---VL-      | -L-----V--        |                          |
|                                                          | Aggregatibacter actinomycetemc               | 261867309 | -----D--T---V--      | -L-----V--        |                          |
|                                                          | Aggregatibacter segnis                       | 493770955 | -----D--T---V--      | -L-----V--        |                          |
|                                                          | Aggregatibacter aphrophilus NJ               | 251793350 | -----D--T---V--      | -L-----V--        |                          |
|                                                          | Gallibacterium anatis UMN179                 | 332289404 | -----D-L---VL-       | -----             |                          |
| Other<br><i>Gammaproteo-</i><br><i>bacteria</i><br>0/250 | Psychromonas ingrahamii 37                   | 119944303 | ---I---E---EDLVD     | -V-----           |                          |
|                                                          | Xenorhabdus nematophila                      | 498909906 | ---I---EEM--T--MLD   | -V-----D----      |                          |
|                                                          | Serratia symbiotica                          | 493761013 | ---IT--EEM----MLD    | -V-----D-V--      |                          |
|                                                          | Alteromonas sp. SN2                          | 333894384 | ---RI---EEV-E--DMVE  | -L-----D----      |                          |
|                                                          | Arsenophonus nasoniae                        | 284009170 | ---I---EEM----MLD    | -V-----D----      |                          |
|                                                          | Sodalis glossinidius str. 'mor               | 85058488  | ---I---EEM----MLD    | -V-----D-V--      |                          |
|                                                          | Cronobacter sakazakii ATCC BAA               | 156932730 | ---I---EEM----MLD    | -L-----D-V--      |                          |
|                                                          | Morganella morganii subsp. mor               | 455738312 | ---I---EEM----MLD    | -V-----D-V--      |                          |
|                                                          | Salmonella enterica                          | 487688971 | ---I---EEM----MLD    | -V-----D-V--      |                          |
|                                                          | Shigella flexneri                            | 491272795 | ---I---EEM----MLD    | -V-----D-V--      |                          |
|                                                          | Citrobacter freundii                         | 489124323 | ---I---EEM----MLD    | -V-----D-V--      |                          |
|                                                          | Escherichia coli                             | 446148970 | ---I---EEM----MLD    | -V-----D-V--      |                          |

**Supplementary Figure 1**

Partial sequence alignment for GTP pyrophosphokinase. The protein contains 1 aa insertion that is specific for *Actinobacillus sensu stricto*.

|                                            |                                           |           |                                |              |             |
|--------------------------------------------|-------------------------------------------|-----------|--------------------------------|--------------|-------------|
|                                            |                                           |           | 359                            |              | 400         |
|                                            | Actinobacillus ureae ATCC 25976           | 322119155 | TITGGKLMTYRLMAEWATDLVCKKLNKSDR | L            | CSTAERPLPGS |
|                                            | Actinobacillus suis H91-0380              | 407692608 | -----T-----                    | -            | -----       |
|                                            | Actinobacillus suis ATCC 33415            | 672592320 | -----T-----                    | -            | -----       |
|                                            | Actinobacillus capsulatus                 | 517481249 | -----                          | -            | -----       |
|                                            | Act. pleuropneumonia ser. 3 str. JL03     | 165975838 | -----                          | -            | -----       |
|                                            | Act. pleuropneumonia ser. 6 str. Femo     | 302651308 | -----                          | -            | -----       |
|                                            | Act. pleuropneumonia ser. 2 str. 4226     | 302648590 | -----                          | -            | -----       |
|                                            | Act. pleuropneumonia ser. 12 str. 1096    | 306869420 | -----                          | -            | -----       |
| Actinobacillus<br>sensu stricto            | Act. pleuropneumonia ser. 4 str. M62      | 306858454 | -----                          | -            | -----       |
|                                            | Act. pleuropneumonia ser. 2 str. S1536    | 306856077 | -----                          | -            | -----       |
|                                            | Act. pleuropneumonia ser. 10 str. D13039  | 306865053 | -----                          | -            | -----       |
|                                            | Act. pleuropneumonia ser. 13 str. N273    | 306871605 | -----                          | -            | -----       |
|                                            | Act. pleuropneumonia ser. 1 str. 4074     | 306853852 | -----                          | -            | -----       |
|                                            | Act. pleuropneumonia ser. 9 str. CVJ13261 | 306862854 | -----                          | -            | -----       |
|                                            | Act. pleuropneumonia ser. 11 str. 56153   | 306867274 | -----                          | -            | -----       |
|                                            | Act. pleuropneumonia ser. 5b str. L20     | 126207863 | -----                          | -            | -----       |
|                                            | Act. pleuropneumonia ser. 7 str. AP76     | 190149672 | -----                          | -            | -----       |
|                                            | Actinobacillus minor                      | 492378962 | -----                          | -            | -----       |
|                                            | Actinobacillus succinogenes 13            | 152977891 | -----VNKK                      | -E--D-T----  |             |
|                                            | Mannheimia succiniciproducens             | 52308100  | -----Q--N-KK                   | -E-SD-T----  |             |
|                                            | Pasteurella bettyae                       | 492141813 | -----N-KT                      | -E--D-V----  |             |
|                                            | Pasteurella dagmatis                      | 492153891 | -----NAE                       | -V--KQA----  |             |
|                                            | Pasteurella multocida subsp. m            | 15603307  | -----HAE                       | -V--TQ-----  |             |
|                                            | Pasteurella multocida 36950               | 378775293 | -----HAE                       | -V--TQ-----  |             |
|                                            | Gallibacterium anatis UMN179              | 332289452 | -----I-----HQAE                | -K--KQ-----  |             |
|                                            | Bibersteinia trehalosi USDA-AR            | 470167686 | -----G-TE-                     | -T-H-----    |             |
|                                            | Haemophilus ducreyi 35000HP               | 33152271  | -----VS-                       | -I---CA----  |             |
|                                            | Haemophilus parasuis SH0165               | 219871479 | -----T--                       | -V---KA----  |             |
| Other<br>Pasteurellales                    | Haemophilus pittmaniae                    | 494450103 | -----TA-                       | -T--D-----   |             |
|                                            | Haemophilus parainfluenzae T3T            | 345429343 | -----TA-                       | -T-----      |             |
|                                            | Haemophilus influenzae F3031              | 319897870 | -----TV-                       | -T-----      |             |
|                                            | Haemophilus influenzae Rd KW20            | 16272627  | -----TA-                       | -V---Q-----  |             |
|                                            | Haemophilus influenzae PittGG             | 148827859 | -----TA-                       | -V---Q-----  |             |
|                                            | Haemophilus influenzae 86-028N            | 68249264  | -----TA-                       | -V---Q-----  |             |
|                                            | Haemophilus influenzae R2846              | 386266588 | -----TA-                       | -V--KQ-----  |             |
|                                            | Haemophilus influenzae F3047              | 319775464 | -----TA-                       | -V---QA----- |             |
|                                            | Haemophilus influenzae 10810              | 378696883 | -----TA-                       | -V---QA----- |             |
|                                            | Haemophilus influenzae PittEE             | 148826678 | -----TA-                       | -V---QA----- |             |
|                                            | Haemophilus haemolyticus                  | 491864144 | -----E---TA-                   | -V---Q-----  |             |
|                                            | Plesiomonas shigelloides                  | 499149535 | -----S---R---H-AT              | -T---K-----  |             |
|                                            | Citrobacter rodentium ICC168              | 283786321 | -----A--R--GN-RP               | -V--DT-----  |             |
|                                            | Serratia marcescens FGI94                 | 440228953 | -----N---E--GV-A-              | -T---QA----- |             |
|                                            | Morganella morganii subsp. mor            | 455740577 | -----A--A--GITAH               | -----E-----  |             |
| Other<br>Gammaproteo-<br>bacteria<br>0/250 | Enterobacter asburiae LF7a                | 345300129 | -----Q---A--R--GNTEP           | -V--DK-----  |             |
|                                            | Klebsiella oxytoca                        | 491003182 | -----A--R--GN-VP               | -----DT----- |             |
|                                            | Raoultella ornithinolytica B6             | 481848065 | -----A--R--GN-VP               | -----DT----- |             |
|                                            | Yersinia pestis                           | 488309597 | -----K--E--GI-AA               | -T--QV-----  |             |
|                                            | Escherichia coli                          | 486207164 | -----A--R--GN-RP               | -T--DLA----- |             |
|                                            | Shigella flexneri                         | 491270753 | -----A--R--GNTRP               | -T--DLA----- |             |
|                                            | Vibrio cholerae 0395                      | 147671420 | -----A---GNTQS                 | -Q-HL-----   |             |

## Supplementary Figure 2

Partial sequence alignment for anaerobic glycerol-3-phosphate dehydrogenase subunit A. The protein contains 1 aa insertion that is uniquely shared by *Actinobacillus sensu stricto*.

|                                                      |                                 | 34        | 75                        |
|------------------------------------------------------|---------------------------------|-----------|---------------------------|
|                                                      | Haemophilus influenzae PittEE   | 148825193 | INDLLPEDAIDPEYYDKLLQTL    |
|                                                      | Haemophilus influenzae 22.1-21  | 144979387 | -----                     |
|                                                      | Haemophilus influenzae 86-028NP | 68249130  | -----                     |
|                                                      | Haemophilus influenzae 3655     | 144985884 | -----                     |
|                                                      | Haemophilus influenzae KR494    | 543951383 | -----                     |
|                                                      | Haemophilus influenzae R2866    | 491910936 | -----                     |
|                                                      | Haemophilus influenzae F3047    | 503292748 | -----                     |
|                                                      | Haemophilus influenzae 10810    | 505740084 | -----                     |
| <b>Haemophilus<br/>Sensu Stricto</b>                 | Haemophilus sp. oral taxon 851  | 497182876 | -----V-----E---           |
|                                                      | Haemophilus haemolyticus M21639 | 491862772 | -----V-----E---           |
|                                                      | Haemophilus haemolyticus M21127 | 491851008 | -----V-----E---           |
|                                                      | Haemophilus haemolyticus M19107 | 491841414 | -----V-----E---           |
|                                                      | Haemophilus haemolyticus M19501 | 491847886 | -----V-----E---           |
|                                                      | Haemophilus parainfluenzae      | 503830655 | -----L-----H-----E---     |
|                                                      | Pasteurella pneumotropica       | 517167701 | -----V-----H-----P-----I- |
|                                                      | Haemophilus pittmaniae          | 343519915 | -----V-----E---           |
|                                                      | H. sputorum                     | 359299231 | VH-H---ELV-A-QIEDII-MI    |
|                                                      | H. paraphrohaemolyticus         | 386390298 | VH-H---ELV-A-QIEDII-MI    |
| <b>Other<br/>Haemophilus</b>                         | H. parahaemolyticus             | 387772261 | VH-H---ELV-A-QIEDII-MI    |
|                                                      | H. ducreyi                      | 33151868  | VH-H---ELV-A-QIEDII-MI    |
|                                                      | H. parasuis                     | 167855425 | VH-H---ELV-ADQIEDII-MI    |
|                                                      | Histophilus somni               | 170719016 | V--H---LV-ADQIEDVI-MI     |
|                                                      | Act. pleuropneumoniae           | 307264154 | VH-H---ELV-A-QIEDII-MI    |
| <b>Other<br/>Pasteurellales</b>                      | Act. ureae                      | 322513554 | VH-H---ELV-A-QIEDII-MI    |
|                                                      | Act. succinogenes               | 152978401 | V--H---LV-TDQIEDII-MI     |
|                                                      | Act. minor                      | 257464575 | VH-H---ELV-A-QIEDII-MI    |
|                                                      | Agg. actinomycetemcomitans      | 261868195 | V--S---ELV-ADQIEDII-MI    |
|                                                      | Agg. segnis                     | 315634867 | V--S---ELV-ADQIEDII-MI    |
|                                                      | Agg. aphrophilus                | 251793982 | V--S---ELV-ADQIEDII-MI    |
|                                                      | Man. succiniciproducens         | 52425815  | V--H---ELV-TDQIEDII-MI    |
|                                                      | Man. haemolytica                | 261492895 | VH-H---ELV-A-QIEDII-MI    |
|                                                      | Past. multocida                 | 383311804 | V--H---ELV-A-QIEDII-MI    |
|                                                      | Past. dagmatis                  | 260912696 | V--H---ELV-A-QIEDII-MI    |
| <b>Other<br/>Gammaproteo-<br/>bacteria<br/>0/250</b> | Gallibacterium anatis           | 332288976 | V--S---LV-ADQIEDII-MI     |
|                                                      | Acinetobacter lwoffii           | 262376664 | V--H--DSITES-QIEDII-M     |
|                                                      | Aliivibrio salmonicida          | 209696105 | V--H---EIV-S-QVEDII-MI    |
|                                                      | Arsenophonus nasoniae           | 284008589 | V--H---IV-SDQIEDII-MI     |
|                                                      | Baumannia cicadellinicola       | 94676896  | V-----IV-SDQIEDII-MI      |
|                                                      | Buchnera aphidicola             | 384227506 | V--H---I--S-QI-DII-MI     |
|                                                      | Citrobacter freundii            | 365103141 | V--H---IV-SDQIEDII-MI     |
|                                                      | Congregibacter litoralis        | 88704608  | V--H---IS--DQVEDII-MI     |
|                                                      | Cronobacter turicensis          | 260599325 | V--H---IV-SDQIEDII-MI     |
|                                                      | Dickeya dadantii                | 307129360 | V--H---I--SDQIEDII-MI     |
|                                                      | Edwardsiella ictaluri           | 238918478 | V--H---IV-SDQIEDII-MI     |
|                                                      | Enterobacter aerogenes          | 336247240 | V--H---IV-SDQIEDII-MI     |
|                                                      | Erwinia amylovora               | 292486903 | V--H---IV-SDQIEDII-MI     |
|                                                      | Escherichia coli                | 377982750 | V--H---IV-SDQIEDII-MI     |
|                                                      | Grimontia hollisae              | 262275021 | V--H---IV-SDQIEDII-MI     |
|                                                      | Klebsiella oxytoca              | 376381681 | V--H---IV-SDQIEDII-MI     |
|                                                      | Oceanimonas sp. GK1             | 374336959 | V--H--Q-IV-SDQIEDII-MI    |
|                                                      | Pantoea agglomerans             | 390435428 | V--H---IV-SDQIEDII-MI     |
|                                                      | Photobacterium luminescens      | 37527834  | V--H---IV-SDQIEDII-MI     |
|                                                      | Proteus penneri                 | 226327186 | V--H---IV-SDQIEDII-MI     |
|                                                      | Providencia stuartii            | 183597880 | V--H---IV-SDQIEDII-MI     |
|                                                      | Rahnella sp. Y9602              | 322831339 | V--H---IV-SDQIEDII-MI     |
|                                                      | Salmonella enterica             | 213161043 | V--H---IV-SDQIEDII-MI     |
|                                                      | Serratia odorifera              | 270263179 | V--H---IV-SDQIEDII-MI     |
|                                                      | Shewanella baltica              | 386340136 | V--H--A-MV-SDQIEDII-MI    |
|                                                      | Shigella boydii                 | 187733221 | V--H---IV-SDQIEDII-MI     |
|                                                      | Sodalis glossinidius            | 85058229  | V--H---IV-SDQIEDII-MI     |
|                                                      | Vibrio fischeri                 | 371493750 | V--H---EIV-S-QVEDII-MI    |
|                                                      | Xenorhabdus bovienii            | 290474860 | V--H---IV-SDQIEDII-MI     |
|                                                      | Yersinia aldovae                | 238760057 | V--H---IV-SDQIEDII-MI     |
|                                                      | Yokenella regensburgei          | 365847769 | V--H---IV-SDQIEDII-MI     |
|                                                      |                                 |           | NDAGIPVLDEAPESDDMML       |

### Supplementary Figure 3

Partial sequence alignment for Aspartate ammonia-lyase. The protein contains 1 aa (glutamine) insertion that is specific for a clade consisting of *H. influenzae*, *H. aegyptius*, *H. haemolyticus*, *H. sp. oral taxon 851*, *H. parainfluenzae*, and *H. pittmaniae*. The remaining *Haemophilus* species and other *Pasteurellales* and *Gammaproteobacteria* species (250 blasts) do not contain the CSI.

|                                        |                                       |           | 352               | 378          |
|----------------------------------------|---------------------------------------|-----------|-------------------|--------------|
| <i>Haemophilus Sensu Stricto</i>       | Haemophilus influenzae 3655           | 144986549 | DVVLRGVTVVRDGEEI  | PPAQIQVSAQP  |
|                                        | Haemophilus influenzae R3021          | 491888782 | -----             | -----        |
|                                        | Haemophilus influenzae 10810          | 505740607 | -----             | -----        |
|                                        | Haemophilus influenzae KR494          | 543997178 | -----             | -----        |
|                                        | Haemophilus influenzae PittGG         | 500630890 | -----             | -----        |
|                                        | Haemophilus influenzae PittEE         | 500625845 | -----             | -----        |
|                                        | Haemophilus influenzae 22.1-21        | 491882181 | -----             | -----        |
|                                        | Haemophilus sp. FF7                   | 692226876 | -----             | -----        |
|                                        | Haemophilus influenzae Rd KW20        | 16273272  | -----             | -----        |
|                                        | Pasteurella pneumotropica             | 517167151 | -----             | -----        |
|                                        | Haemophilus pittmaniae                | 494451436 | -----             | -----        |
|                                        | Haemophilus haemolyticus M19107       | 491841549 | -----             | -----        |
|                                        | Haemophilus haemolyticus M21127       | 491853823 | -----             | -----        |
|                                        | Haemophilus parainfluenzae HK262      | 491967783 | -----             | -----        |
|                                        | Haemophilus parainfluenzae ATCC 33392 | 491966042 | -----             | -----        |
| <i>Other Haemophilus</i>               | Haemophilus parainfluenzae T3T1       | 503831535 | -----             | -----        |
|                                        | Haemophilus aegyptius                 | 494053950 | -----             | -----        |
|                                        | H. sp. oral taxon 851                 | 373467219 | -----             | -----        |
|                                        | H. parasuis                           | 167854584 | -----I---KVT      | W -APP-----  |
|                                        | H. parahaemolyticus                   | 387773029 | -----I-E--VT      | W -APP-----  |
|                                        | H. sputorum                           | 359299851 | -----I---LT       | W -APP-----  |
|                                        | H. paraphrohaemolyticus               | 386389589 | -----E--VT        | W -APP-----  |
|                                        | H. ducreyi                            | 33152693  | ---V---I---VT     | W -APP-----  |
|                                        | Histophilus somni                     | 113460378 | -----I---VT       | W -APP-----T |
|                                        | Act. ureae                            | 322514553 | -----LT           | W -APP-----  |
| <i>Other Pasteurellales</i>            | Act. pleuropneumoniae                 | 190150168 | -----LT           | W -APP-----  |
|                                        | Act. succinogenes                     | 152978693 | -----I---VT       | W -APP-----  |
|                                        | Act. minor                            | 257465417 | -----I---VT       | W -APP-----  |
|                                        | Agg. segnis                           | 315634400 | -----I---VT       | W -APP-----  |
|                                        | Agg. actinomycetemcomitans            | 293390251 | -----I---KIT      | W -APP-----  |
|                                        | Agg. aphrophilus                      | 251792709 | -----I-E--IT      | W -APP-----  |
|                                        | Gallibacterium anatis                 | 332288590 | ---Q---I---VT     | W -APP-K---- |
|                                        | Man. haemolytica                      | 254361623 | -----LT           | W -APP-----L |
|                                        | Man. succiniciproducens               | 52425279  | ---I---I-N--VT    | W -APP-K---- |
|                                        | Past. multocida                       | 15602618  | -----I---VT       | W -APP-----  |
| <i>Other Gammaproteobacteria 0/250</i> | Past. dagmatis                        | 260914246 | -----I-E--VT      | W -APP-K---- |
|                                        | Aliivibrio salmonicida                | 209809408 | -----KE--VT       | W -APP-----  |
|                                        | Enterobacter cloacae                  | 311279548 | ---V---I-E--VT    | W -APP-----  |
|                                        | Escherichia coli                      | 187776147 | ---I---I-A--IT    | W -APP-----  |
|                                        | Grimontia hollisae                    | 262273996 | -----K---IT       | W -APP-----  |
|                                        | Pantoea ananatis                      | 291617548 | ---I---I---VT     | W -APP----A- |
|                                        | Pectobacterium carotovorum            | 227111338 | -T-I---I-KE--IT   | W -APP-----  |
|                                        | Photobacterium profundum              | 90412639  | -E---L--I-KE--IT  | W -APP-K--A- |
|                                        | Photorhabdus luminescens              | 37526083  | ---I---I---KE--MT | W -APP-----  |
|                                        | Proteus penneri                       | 226329945 | ---I---I-A--VT    | W -APP-----  |
|                                        | Providencia stuartii                  | 183599058 | ---I---I-KQ--IT   | W -APP-----  |
|                                        | Salmonella enterica                   | 168235558 | ---I---I---DIT    | W -APP-----  |
|                                        | Vibrio fischeri                       | 197337488 | -----KE--VT       | W -APP-----  |
|                                        | Vibrionales bacterium                 | 148981352 | -----KE--VT       | W -APP-----  |
|                                        | Yersinia rohdei                       | 238749352 | -T-I---I---KT--VT | W -APP-----  |

#### Supplementary Figure 4

Partial sequence alignment for NAD(P) transhydrogenase subunit alpha. This protein region show 1 aa (Tryptophan) deletion that is specific for a clade consisting of *H. influenzae*, *H. aegyptius*, *H. haemolyticus*, *H. sp. oral taxon 851*, *H. parainfluenzae*, and *H. pittmaniae*. The remaining *Haemophilus* species and other *Pasteurellales* or *Gammaproteobacteria* species (250 blasts) do not contain the CSI.

|                                           |                                |          |            | 31                          |                                | 89                            |
|-------------------------------------------|--------------------------------|----------|------------|-----------------------------|--------------------------------|-------------------------------|
| <i>Haemophilus Sensu Stricto</i>          | Haemophilus influenzae         | 86-028NP | 68249428   | LREATSVFAVWFCIVLLYGVLCASNP  | MPG                            | LGILSFIEFLRNPVIVFLNIITLIATLYH |
|                                           | Haemophilus influenzae         | PittGG   | 148828019  | -----                       | -----                          | -----                         |
|                                           | Haemophilus influenzae         | F3031    | 319897673  | -----                       | -----                          | -----                         |
|                                           | Haemophilus influenzae         | R3021    | 144983972  | -----                       | -----                          | -----                         |
|                                           | Haemophilus influenzae         | F3031    | 317433179  | -----                       | -----                          | -----                         |
|                                           | Haemophilus influenzae         | 10810    | 378697034  | -----                       | -----                          | -----                         |
|                                           | Haemophilus influenzae         | PittHH   | 145270132  | -----                       | -----                          | -----                         |
|                                           | Haemophilus influenzae         | HK1212   | 270317146  | -----                       | -----                          | -----                         |
|                                           | Haemophilus influenzae         | M19501   | 341949445  | -----                       | -----                          | -----                         |
|                                           | Haemophilus influenzae         | M21127   | 341950834  | -----                       | -----                          | -----                         |
|                                           | Haemophilus influenzae         | M21639   | 341956009  | -----                       | -----                          | -----                         |
|                                           | Haemophilus haemolyticus       |          | 342905181  | -----I-----                 | I-----                         | -----                         |
|                                           | Haemophilus aegyptius          |          | 329122840  | -----I-----                 | IL--D-----                     | -----                         |
|                                           | Haemophilus parainfluenzae     |          | 325579196  | V-----I-----                | V-----                         | -----                         |
|                                           | Haemophilus pittmaniae         |          | 343517839  | -----I-----                 | M--FD--G--K-----V-----         | -----                         |
| <i>Other Haemophilus</i>                  | Haemophilus sp. oral taxon 851 |          | 373466532  | -----I-----                 | I-----                         | -----                         |
|                                           | Pasteurella pneumotropica      |          | 2516029750 | -----I-----                 | I--H--F-----L-----V-----       | -----                         |
|                                           | Haemophilus sputorum           |          | 359298516  | V-----IPT---SL--F---IT-GRGT | FATD-VS-VQ---IVF-L-S-A-I---    | -----                         |
|                                           | Haemophilus paraphaemolyticus  |          | 386389927  | V-----AIPT---L-----IA-GNGT  | FDTN-VD--K---II--LVS-A-M-L-    | -----                         |
|                                           | Haemophilus parahaemolyticus   |          | 387772210  | V-----AIPT---L-----IS-GNGT  | FDT--VD--K---II--LVS-A-M-L-    | -----                         |
|                                           | Haemophilus parasuis           |          | 167855691  | ---S---PT---L--F--LV--GNGT  | FATT-VG--Q--V--I-----G-V-LN    | -----                         |
|                                           | Haemophilus ducreyi            |          | 33151306   | I---CIATI---L-----IS-GGRH   | -EN--S-SQ--L--I---S-AGL---     | -----                         |
|                                           | Histophilus somni              |          | 113461422  | M---AIPSL--SL-----I--GQKD   | GLQSD--P--Q---II---A-A-AILN    | -----                         |
|                                           | Act. minor                     |          | 240948013  | V-----AIPT---L-----LIS-GNGT | FATD-LT--K--LI-IF-LVS-V-M---   | -----                         |
|                                           | Act. ureae                     |          | 322513266  | V---CLAT---L-----IS-GGEG    | LEN--S--Q---FI--V-SIA-L---     | -----                         |
| <i>Other Pasteurellales</i>               | Act. pleuropneumoniae          |          | 46143534   | V---CLAT---L---H--IS-GGGS   | LDG--S--Q---FI--V-SIA-L---     | -----                         |
|                                           | Act. succinogenes              |          | 152979472  | V---A-PT---L-----FS--D-T    | FATD-VG-MQ---MI---S-A-M-L-     | -----                         |
|                                           | Agg. aphrophilus               |          | 251793019  | ---ALPT---SL-----I--GKAD    | GFVMN--P--Q---I-I---VS-A-L-L-  | -----                         |
|                                           | Agg. segnis                    |          | 315633841  | ---A-PT---SL-----I--GKAD    | GFVM---P--Q--L--I---S-A-L-L-   | -----                         |
|                                           | Agg. actinomycetemcomitans     |          | 261867504  | V---ALPT---SL-----I--GKAD   | GF-A---P--Q---I---S-A-L-L-     | -----                         |
|                                           | Man. succiniciproducens        |          | 152979472  | V---A-PT---L-----FS--D-T    | FATD-VG-MQ---MI---S-A-M-L-     | -----                         |
|                                           | Man. haemolytica               |          | 254362605  | V---CLPT---F--AVA-SKGT      | FTTD-VD--Q--L--I---S-A-M---    | -----                         |
|                                           | Past. dagmatis                 |          | 260914415  | A---AIPTL---L-----IS-GNIE   | SFGN--A-----I-----G-M-LN       | -----                         |
|                                           | Past. multocida                |          | 15602064   | A---AIPTL---L-----IS-G-LD   | SFGN--S--K---II-----G-M-LN     | -----                         |
|                                           | Gallibacterium anatis          |          | 332288836  | ---S---PTI---LE-F--LT--GNGT | FDSN-VN--Q--V--I-----G-V-LN    | -----                         |
| <i>Other Gammaproteobacteria</i><br>0/250 | Citrobacter koseri             |          | 157147874  | ---G-A-P---S-E-IF-LFA-KHGA  | ESWMG-VG--Q--V--I--L-A-A-A-L-  | -----                         |
|                                           | Cronobacter turicensis         |          | 260599495  | ---G--P---S---I--LFA-KHG-   | ESWAG-VG--Q--V--L-----L-A-L-   | -----                         |
|                                           | Dickeya zeae                   |          | 251788028  | ---G-A-P---S---H--FS-KAG-   | E-WGH-VG--Q--L-L-L--VA-L-AVL-  | -----                         |
|                                           | Edwardsiella tarda             |          | 304557750  | ---SSALEN---S---I---FS-KDGA | A-WE--VA--Q--L-LV---S-LLAVL-   | -----                         |
|                                           | Enterobacter aerogenes         |          | 336248333  | ---G-A-PT---S---I--LFA-KHGA | ESWEGYVA--Q---I--L--A-A-L-     | -----                         |
|                                           | Erwinia billingiae             |          | 300715026  | ---ALP-L--SLEMIF-LFA-KNGE   | QSWQA-VAV-QH--MLLI--VA-A-A-L-  | -----                         |
|                                           | Escherichia coli               |          | 15804746   | ---G-A-P---S-E-IF-LFA-KNG-  | EAWAG-VD--Q--VI-II-L--A-A-L-   | -----                         |
|                                           | Grimontia hollisae             |          | 262273031  | ---VLPLIF-TLC-TF-LGS-VLGE   | AAWN-WLS-MA--VAIAI--VA-AGS-F-  | -----                         |
|                                           | Klebsiella pneumoniae          |          | 206578658  | V--G-A-PT---S---I--LFA-KHGA | ESWAGY-G--Q--V--I--L--A-A-L-   | -----                         |
|                                           | Pectobacterium atrosepticum    |          | 50122891   | ---G-A-P---S-I-MC-IFA-KNG-  | E-WAN-VS--Q--L-LII--VA-L-AAL-  | -----                         |
|                                           | Photobacterium profundum       |          | 54310447   | V---ILPLIF-T-C-TF-LG--VKG-  | EAWAGWLS-MS-----V--LA-LGS-F-   | -----                         |
|                                           | Providencia alcalifaciens      |          | 212710997  | M--S---LQ---S-LV---FA-KNG-  | ESWAG-VG--S---ILII--V-A--L-    | -----                         |
|                                           | Salmonella enterica            |          | 194448129  | ---G-A-P---S-E-IF-LFA-KHGA  | ESWMG-VG--Q--V--I--L--A-A-L-   | -----                         |
|                                           | Serratia odorifera             |          | 293393230  | ---G---P---S---I---FA-KGG-  | DSWVG--G--Q--L-LII--VA-L-A-L-  | -----                         |
|                                           | Shigella dysenteriae           |          | 82779425   | ---G-A-P---S-E-IF-LFA-KNG-  | EAWAG-VD--Q--VI-II-L--A-A-L-   | -----                         |
|                                           | Vibrio cholerae                |          | 15642653   | V---VLPLIL-TLF-TV-LGS-VKG-  | EAWQTWLD-MA--L-IAI-LVA-AGS-F-  | -----                         |
|                                           | Vibrionales bacterium          |          | 148976863  | ---VLPLIL-TVF-TF-LGA-VKG-   | EAWAGWLS-MA---I-GI--VA-LGS-M-  | -----                         |
|                                           | Xenorhabdus nematophila        |          | 300721664  | ---G---P---SLLV---LFA-KNG-  | ESWAG-VA--Q---LLI---L-A-L-     | -----                         |
|                                           | Yersinia pestis                |          | 22124529   | ---G--IP---SVL-I---FA-K-G-  | A-WEG-VS--Q--L-L-L---L--F-A-L- | -----                         |

## Supplementary Figure 5

Partial sequence alignment for Fumarate reductase subunit C. The protein contains 3 aa insertion that is specific for a clade consisting of *Haemophilus influenzae*, *Haemophilus aegyptius*, *Haemophilus haemolyticus*, *Haemophilus sp. oral taxon 851*, *Haemophilus parainfluenzae*, and *Haemophilus pittmaniae*. The remaining *Haemophilus* species and other *Pasteurellales* or *Gammaproteobacteria* species (250 blasts) do not contain the CSI.

|                                        |                                     |           | 17                       | 58                    |
|----------------------------------------|-------------------------------------|-----------|--------------------------|-----------------------|
| <i>Haemophilus Sensu Stricto</i>       | Haemophilus influenzae 22.1-21      | 145636352 | NIGSAARAMKTMGLTQLCLVSPKS | VDEQSYALSAGAENIVKN    |
|                                        | Haemophilus influenzae PittGG       | 148827519 | -----                    | -----                 |
|                                        | Haemophilus influenzae F3047        | 319775753 | -----                    | -----                 |
|                                        | Haemophilus influenzae F3031        | 319896709 | -----                    | -----                 |
|                                        | Haemophilus influenzae KW20         | 20178339  | -----                    | -----                 |
|                                        | Haemophilus influenzae NT127        | 260094339 | -----                    | -----                 |
|                                        | Haemophilus influenzae R2866        | 386263423 | -----                    | -----                 |
|                                        | Haemophilus influenzae PittII       | 309750201 | -----                    | -----                 |
|                                        | Haemophilus influenzae 10810        | 378696563 | -----                    | -----                 |
|                                        | Haemophilus influenzae PittAA       | 145268169 | -----                    | -----                 |
|                                        | Haemophilus influenzae R2846        | 386265225 | -----                    | -----                 |
|                                        | Haemophilus influenzae 86-028NP     | 68057182  | -----                    | -----                 |
|                                        | Haemophilus influenzae 3655         | 144986822 | -----                    | -----                 |
|                                        | Haemophilus influenzae 7P49H1       | 229810560 | -----                    | -----                 |
|                                        | Haemophilus influenzae 6P18H1       | 229812781 | -----                    | -----                 |
|                                        | Haemophilus influenzae PittHH       | 145270517 | -----                    | -----                 |
|                                        | Haemophilus influenzae Rd KW20      | 16272328  | -----                    | -----                 |
|                                        | Haemophilus haemolyticus            | 142904025 | -----                    | -----D-----           |
|                                        | Haemophilus aegyptius               | 329123594 | -----                    | -----                 |
|                                        | Haemophilus parainfluenzae          | 301155740 | -----SN-Y-----           | -----I--A---DDL-R-    |
| Other <i>Haemophilus</i>               | Haemophilus pittmaniae              | 343519305 | -----NE-Y-----C          | I----I--A---DD--I-    |
|                                        | Pasteurella pneumotropica DSM 21403 | 516029676 | -----S-----V             | -----I--A---AD----    |
|                                        | Haemophilus sp. oral taxon 851      | 373467487 | -----A-----              | -----D-----           |
|                                        | Haemophilus sputorum                | 359299850 | ----V-----H-----A-QK     | A I---AV--A---KDVLD-  |
|                                        | Haemophilus parasuis                | 167854979 | -----SR-R--A--Q          | A I---AI--A---KDVLD-  |
|                                        | Haemophilus ducreyi                 | 33152694  | -----SN-R--R--N          | P L---AT--A---K--LD-  |
|                                        | Haemophilus paraphrohaemolyticus    | 386389590 | -----ISH-R--A--Q         | P L---DAF-----KDLLE-  |
|                                        | Haemophilus parahaemolyticus        | 387773034 | ----V-----SH-R--E--R     | P L---DAF-----KDLLE-  |
|                                        | Histophilus somni                   | 113460425 | -----N-----A--Q          | G I---AV--A---DV--S   |
|                                        | Act. pleuropneumoniae               | 307254675 | -----SN-R-----LN         | P I---Q--A---KDVLD-   |
| Other <i>Pasteurellales</i>            | Act. minor                          | 240943933 | ----T-----A-----Q        | P I---AVS-A---KDVLD-  |
|                                        | Act. succinogenes                   | 152978538 | -----N-Y--A---           | R I-A-AV-----DVI--    |
|                                        | Act. ureae                          | 322514554 | -----SN-R-----LN         | P I---AQ--A---KDVLD-  |
|                                        | Agg. aphrophilus                    | 251792921 | -----D-V--A--Q           | G --D-AI--A---DL--S   |
|                                        | Agg. actinomycetemcomitans          | 293390584 | -----D-V--A--Q           | S ---AI--A---DV--S    |
|                                        | Agg. segnis                         | 315633898 | ----T-----D-V--A--Q      | G --D-AI--A---DV--S   |
|                                        | Man. succiniciproducens             | 52425783  | -----AN-Y-----Q          | G I---AV-----DVLRK    |
|                                        | Man. haemolytica                    | 261493539 | -----H-R--A--Q           | P L---AE--A---KDVLD-  |
|                                        | Past. dagmatis                      | 260912947 | -----SH-Y--A-RQ          | A I---AI-----DV--Q    |
|                                        | Past. multocida                     | 15602181  | -----N--Y--A--Q          | P L---HAI-----DVL-Q   |
| Other <i>Gammaproteobacteria</i> 0/250 | Gallibacterium anatis               | 332289843 | -----S--Y-----V          | L PN-E-I-----DDV--Q   |
|                                        | Aeromonas hydrophila                | 117618072 | -M-----S-MV--D-QA        | Q P-DNA-----SDLLA-    |
|                                        | Alteromonadales bacterium           | 119470463 | -----SK-Y--D-AC          | E I-SHAS-----SDVLG-   |
|                                        | Ferrimonas balearica                | 308050472 | -----S--F-AE--V          | A P-G--I--A---SDLL--  |
|                                        | Grimontia hollisae                  | 262274801 | -----V---KHMV--A-EC      | K --G-AI--A---SD-AN-  |
|                                        | Photobacterium damsela              | 269103289 | -----V---N-V--D-AC       | E I---AM--A---SD--E-  |
|                                        | Proteus penneri                     | 226328027 | -M--T-----N-YF-N--E      | K P-SH-I-----SDVIG-   |
|                                        | Pseudoalteromonas haloplanktis      | 332532349 | -----SK-Y--D-AC          | E I-S-AS--A---TDVLG-  |
|                                        | Pseudoxanthomonas suwonensis        | 319787464 | ---A-----SR-V---EK       | P L-DTA-RR-----DVLDS  |
|                                        | Psychromonas ingrahamii             | 119945066 | -V-----K-V--T-EC         | E I-GK-I-----SDVL--   |
|                                        | Shewanella loihica                  | 127513248 | ----T-----ST-Y-AE--V     | A P-G--V--A---SD-L-H  |
|                                        | Shigella dysenteriae                | 194432193 | ----V-----N-W--N-LV      | K P-S-AI--A---SDVIG-  |
|                                        | Sodalis glossinidius                | 85059749  | ----T-----SN-Y--N-LH     | K P-A-AI-----SD-IG-   |
|                                        | Tolumonas auensis                   | 237808766 | -----S--V--D-VQ          | P P--K-T--A---ND-LA-  |
|                                        | Vibrio angustum                     | 90579380  | -----V---N-V--D-AC       | E ---GHTI--A---ADV-E- |
|                                        | Vibrionales bacterium               | 148979594 | -----V---S--V--D-QC      | E ---TL--A---GD-AE-   |
|                                        | Xanthomonas fuscans                 | 294624425 | ---A-----VSR-V--A-ER     | A L--DA-RR-----DVL SQ |
|                                        | Xenorhabdus bovienii                | 290476021 | -M-----N-Y--N-LV         | Q P-SH-I-----SDVIG-   |
|                                        | Yersinia intermedia                 | 238795106 | -M--T-----N-Y--N-LV      | K P-S-AI-----SDVIG-   |

### Supplementary Figure 6

Partial sequence alignment for Hypothetical tRNA/rRNA methyltransferase. This protein region show 1 aa deletion that is specific for a clade consisting of *Haemophilus influenzae*, *Haemophilus aegyptius*, *Haemophilus haemolyticus*, *Haemophilus sp. oral taxon 851*, *Haemophilus parainfluenzae*, and *Haemophilus pittmaniae*. The remaining *Haemophilus* species and other *Pasteurellales* or *Gammaproteobacteria* species (250 blasts) do not contain the CSI.

|                                        |                                   |            | 197                                | 253                     |
|----------------------------------------|-----------------------------------|------------|------------------------------------|-------------------------|
| <i>Haemophilus Sensu Stricto</i>       | <i>H. influenzae</i> R3021        | 144984261  | ATRSGIETIIAPGNRPNIADLAYEQNIGTKFIA  | H QSDRLSRKQWLFAAPSAGIIT |
|                                        | <i>H. influenzae</i> 3655         | 144987185  | -----                              | -----                   |
|                                        | <i>H. influenzae</i> PittAA       | 145268512  | -----                              | -----                   |
|                                        | <i>H. influenzae</i> 22.4-21      | 145273391  | -----                              | -----                   |
|                                        | <i>H. influenzae</i> 6P18H1       | 229813038  | -----                              | -----                   |
|                                        | <i>H. influenzae</i> M19107       | 341951493  | -----                              | -----                   |
|                                        | <i>H. influenzae</i> F3047        | 317449758  | -----                              | -----                   |
|                                        | <i>H. influenzae</i> M21127       | 341949145  | -----                              | -----                   |
|                                        | <i>H. influenzae</i> 10810        | 378697101  | -----                              | -----                   |
|                                        | <i>H. influenzae</i> PittHH       | 145269827  | -----                              | -----                   |
|                                        | <i>H. influenzae</i> NT127        | 260095321  | -----                              | -----                   |
|                                        | <i>H. influenzae</i> R2866        | 386264654  | -----                              | -----                   |
|                                        | <i>H. influenzae</i> PittII       | 145272608  | -----                              | -----                   |
|                                        | <i>H. aegyptius</i>               | 329122915  | -----V                             | -----                   |
|                                        | <i>H. haemolyticus</i>            | 342903547  | -----I-----                        | -----                   |
|                                        | <i>H. pittmaniae</i>              | 343517903  | -----A--V---QKP-----               | -A-----CV-TL-           |
|                                        | <i>H. parainfluenzae</i>          | 345429559  | -----S-D-V---DKP-----              | H-----ML-               |
|                                        | <i>H. sp. oral taxon 851</i>      | 373467991  | -----                              | -----                   |
| Other <i>Haemophilus</i>               | <i>Pasteurella pneumotropica</i>  | 2516030440 | -----V---H-G---T-                  | HA-----A--              |
|                                        | <i>H. paraphrohaemolyticus</i>    | 386389256  | -----V-----S-S-E--LV--NGHA--S--L-  | -----G-----QV-S-V       |
|                                        | <i>H. parahaemolyticus</i>        | 387772439  | -----V-----S-S-E--LV--NG-A--S--VV  | -----G-----QV-S-V       |
|                                        | <i>H. parasuis</i>                | 167855493  | -I---V--A--S-E---FEV-QGAE---R-L-   | -H-KI-G-----G-P--T-Y    |
|                                        | <i>H. sputorum</i>                | 359300234  | -----V-----S-S-E--LV--NGKA--S--LV  | -----G-----QV-S-Y       |
|                                        | <i>Histophilus somni</i>          | 170718754  | -----V-----LE---VN--GKD---VV       | -T-----I---V---V-       |
|                                        | <i>Act. succinogenes</i>          | 152978396  | -----V-----D--T--HGKS---TV         | APEH-----VVI            |
|                                        | <i>Act. minor</i>                 | 240948719  | -----V-----S-S-E--LV--NGKE--S--LV  | -----G-----QV-S--       |
|                                        | <i>Act. pleuropneumoniae</i>      | 307254720  | -----V--V--S-S-A--LV--NGES--S--LV  | -----G-----QV-SLV       |
|                                        | <i>Act. ureae</i>                 | 322514098  | -----V-----S-S-E--LV--NDVA--S--LV  | -----C--G-----QV-AL-    |
| Other <i>Pasteurellales</i>            | <i>Agg. actinomycetemcomitans</i> | 347991576  | -----Q---V-----P-----V             | -A-----VL-              |
|                                        | <i>Agg. aphrophilus</i>           | 347813523  | -----QA---V-----A---TV             | -A-----VLV              |
|                                        | <i>Agg. segnis</i>                | 315633625  | -----Q---V---D-A---TV              | -A-----VL-              |
|                                        | <i>Man. haemolytica</i>           | 254361022  | -----V---G-A---SV                  | -A-----Y-               |
|                                        | <i>Man. succiniciproducens</i>    | 52307969   | -----E-----HGEA---TV               | -T-K-----L-             |
|                                        | <i>Past. dagmatis</i>             | 260912819  | -----S-----GET-----                | -----Y-----             |
|                                        | <i>Past. multocida</i>            | 386835057  | -----V---G-A---SV                  | -A-----Y-----           |
|                                        | <i>Gallibacterium anatis</i>      | 332289427  | -----G-K---L---NNLA---TV           | PPHAI-----IT-H--        |
|                                        | <i>Arsenophonus nasoniae</i>      | 284007761  | -G-A---V---A-DK-----NVLEG-QV---HC  | LKTPM--N--R-I-G--L--E-V |
|                                        | <i>Citrobacter koseri</i>         | 157147175  | -C-A--D---A-SK-G--G-VMAGISA--R-H-  | -ASP--N--R-I-G--P--E--  |
| Other <i>Gammaproteobacteria</i> 0/250 | <i>Cronobacter sakazakii</i>      | 156935258  | -G-A---V--A-SK-G--N-VIEGLPV--R-HP  | -QTP--N--R-I-G--P--E--  |
|                                        | <i>Dickeya dadantii</i>           | 307132275  | -C---DV---A---TG---VINDVSV--R-H-   | LETP---R-I-G--P--E--    |
|                                        | <i>Edwardsiella ictaluri</i>      | 238918850  | -C-A--VV--A-S--G--GEVIDGISV--R-HP  | LQTP--N--R-I-G--P--E-V  |
|                                        | <i>Enterobacter aerogenes</i>     | 336248914  | -C-A--D---A---D--GHAMEGLPV--C-H-   | -ESP--N--R-I-G--P--E--  |
|                                        | <i>Erwinia amylovora</i>          | 292487375  | -C-A--D---A-S--G--G-AIACNPV--R-H-  | LETP--N--R-I-G--P--ELV  |
|                                        | <i>Escherichia coli</i>           | 15799947   | -C-A--D---A-SK-G--G-VMEGISV--L-H-  | -ATP--N--R-I-G--P--E--  |
|                                        | <i>Hafnia alvei</i>               | 365837494  | -C-A--DV---A-SK-G-VG-VIDGVSV--R-H- | LETP--N--R-I-G--P--E--  |
|                                        | <i>Klebsiella oxytoca</i>         | 376388964  | -C-A--D---A-S--G--G-VMEGVSV--R-H-  | -ESP--N--R-I-G--P--E--  |
|                                        | <i>Pantoea ananatis</i>           | 291616445  | -C-A--DV---A-S-SG--S-VIAGKPV--L-H- | -QTP--N--R-I-G--P--E--  |
|                                        | <i>Photorhabdus asymbiotica</i>   | 253990692  | -G-A--DV-V-A-SKS---S-VIEGNPV--R-HG | LASPM--N--R-I-G--P--E-I |
|                                        | <i>Proteus mirabilis</i>          | 227357828  | -G-A--DVV--A-VK-D--SKVIDNEPV--L-HG | LKSP--T--R-I-G--V--V-I  |
|                                        | <i>Providencia alcalifaciens</i>  | 212709386  | -G-A--DV---A--K-D--NAVIENIPV--R-YG | -KNPM--N--R-I-G--A--DVY |
|                                        | <i>Rahnella aquatilis</i>         | 383188939  | -C-A--VD---A-SL-G--G-VINGVSV--R-H- | METP--N--R-I-G--P--E--  |
|                                        | <i>Salmonella enterica</i>        | 56414551   | -C-A--D---S-SK-G--G-VMEGISV--R-H-  | -ASP--N--R-I-G--P--E--  |
|                                        | <i>Serratia marcescens</i>        | 130967     | -C-A--DVV--A-SK-G-V--VIEGKPV--R-H- | LETP--N--R-I-G--P--E--  |
|                                        | <i>Shigella dysenteriae</i>       | 320176707  | -C-A--D---A-SK-G--G-VMEGISV--L-H-  | -ATP--N--R-I-G--PG-E--  |
|                                        | <i>Sodalis glossinidius</i>       | 85058578   | -N-A---VV--A-GK-G--G-MMAGASV--R-HG | -KMP-----R--GP-P--D--   |
|                                        | <i>Xenorhabdus bovienii</i>       | 290476274  | -G-A--VDV--A---E-V--VIEGKSV--R-HG  | -ACPM--N--R-I-G--P--E-I |
|                                        | <i>Yersinia aldovae</i>           | 238760030  | -C-A--DVV--A-SQVG---VIDGTPV--R-H-  | LETP--T--R-I-G--P--E--  |
|                                        | <i>Yokenella regensburgei</i>     | 365848145  | -C-A--D---A-S--G--G-VMEGVSV--R-H-  | -ASP--N--R-I-G--P--E--  |

## Supplementary Figure 7

Partial sequence alignment for Gamma-glutamyl kinase. The protein contains 1 aa (Histidine) insertion that is specific for a clade consisting of *H. influenzae*, *H. aegyptius*, *H. haemolyticus*, *H. sp. oral taxon 851*, *H. parainfluenzae*, and *H. pittmaniae*. The remaining *Haemophilus* species and other *Pasteurellales* or *Gammaproteobacteria* species (250 blasts) do not contain the CSI. *Haemophilus ducreyi* do not contain the homologue protein.

|                                                          |                                     |            | 119                       | 159                  |
|----------------------------------------------------------|-------------------------------------|------------|---------------------------|----------------------|
| <i>Haemophilus</i><br><i>Sensu Stricto</i>               | Haemophilus influenzae HK1212       | 270317394  | GSEGLKKGKKAIVLCAFGGLYDEE  | NLVQYMKSIILGFIGIT    |
|                                                          | Haemophilus influenzae 86-028NP     | 68250119   | -----                     | -----                |
|                                                          | Haemophilus influenzae R2846        | 386265814  | -----                     | -----                |
|                                                          | Haemophilus influenzae KR494        | 543952153  | -----                     | -----                |
|                                                          | Haemophilus influenzae 3655         | 144986545  | -----                     | -----                |
|                                                          | Haemophilus influenzae 6P18H1       | 229813169  | -----                     | -----                |
|                                                          | Haemophilus influenzae 7P49H1       | 229810271  | -----                     | -----                |
|                                                          | Haemophilus influenzae R2866        | 386264219  | -----                     | -----                |
|                                                          | Haemophilus influenzae 22.1-21      | 144978396  | -----                     | -----                |
|                                                          | Haemophilus influenzae PittHH       | 145270596  | -----                     | -----                |
|                                                          | Haemophilus aegyptius               | 329123507  | -----F-----               | -----                |
|                                                          | Haemophilus haemolyticus            | 342904212  | -P-----                   | -----V-----          |
|                                                          | Haemophilus pittmaniae              | 343519865  | -P-----D-----A-C-M--D     | -N--N-L-A--D-V--     |
|                                                          | Haemophilus parainfluenzae          | 325578420  | -P---Q-----AS--M--N       | -N--N-L-A---V--      |
|                                                          | Haemophilus sp. oral taxon 851      | 373467223  | -P-----                   | -----                |
| Other<br><i>Haemophilus</i>                              | Pasteurella pneumotropica DSM 21403 | 2516029975 | -P-----D-----             | -----A---V--         |
|                                                          | Haemophilus parahaemolyticus        | 387772242  | -----IT---V-ILTY--I-KDG   | LA D-PKL--QTV-N----  |
|                                                          | Haemophilus paraphrohaemolyticus    | 386389687  | -P---IT-----IL-H--I-KDS   | PT D-AKL--QTV-N----  |
|                                                          | Haemophilus parasuis                | 167856647  | -P---I---V-VL-H--I-KDG    | PA D-AKM--QTV-N----  |
| Other<br><i>Pasteurellales</i>                           | Agg. segnis                         | 315634175  | -P-----V-A---FHQNQ        | PT D---S---A---V---  |
|                                                          | Agg. aphrophilus                    | 251792472  | -P---T---V-A---FHQNQ      | PT D---A-V-T-----    |
|                                                          | Agg. actinomycetemcomitans          | 293390341  | -P---T---V-A---FHQNQ      | SS DI--A-L-M---V---  |
|                                                          | Past. dagmatis                      | 260914079  | -P---I---L-ILTS--IHQGS    | AT D-AA---IM-----    |
| Other<br><i>Gammaproteo-</i><br><i>bacteria</i><br>0/250 | Gallibacterium anatis               | 332288876  | -PK---PNVPVFAFVTS--E-EGT  | EF DTMSDWV-QV---V-LS |
|                                                          | Cronobacter sakazakii               | 156933866  | -P---VT--R---TSR--IHKDT   | PT D---P-LSLF-----   |
|                                                          | Dickeya dadantii                    | 271500288  | -P---V---R-V---TSR--IHKDT | ES DV-AP-LRLM-----   |
|                                                          | Enterobacter cloacae                | 296102444  | -P---V---R---TSR--IHKDT   | PT D--AP--SLF-----   |
|                                                          | Enterobacteriaceae bacterium        | 317491990  | -P-----VY--TSR--IHKDT     | DT D---P-LRVF-----L- |
|                                                          | Erwinia pyrifoliae                  | 259908386  | -P---I---VV--SSR--IHKDT   | PS D-L-P-LTLF---L-MS |
|                                                          | Escherichia coli                    | 324117609  | -P---VT-----ITSR--IHKDG   | PT D---P-LSTF---S--- |
|                                                          | Grimontia hollisae                  | 262275640  | --Q---T---LIVTTR--MHVGQ   | SS DHI-G-L-TV---V--- |
|                                                          | Pantoea ananatis                    | 291617560  | -P---V---R-VI-SSR--IHKDS  | PS D-L-P-V-LF-----   |
|                                                          | Photorhabdus luminescens            | 37526065   | -P-----QV-I-TSR--IHKDG    | PS D-LVP-LRLF-S---L- |
|                                                          | Serratia odorifera                  | 270262050  | -P---V---R--I-TSR--IHKGT  | PT D--EP-LRLF-----   |
|                                                          | Shigella boydii                     | 320178234  | -P---VT-----ITSR--IHKDG   | PT D---P-LSTF-----   |
|                                                          | Vibrio harveyi                      | 153831886  | -VQ--IE-----VTTR--HKDS    | PT DSM-P-LRTV---V--- |
|                                                          | Xenorhabdus bovienii                | 290475378  | -P-----N-R---TSR--IHKDN   | PT D-I-P-LRTF-----N  |
|                                                          | Yersinia kristensenii               | 238762559  | -P---IT--R--I-TSR--IHKDT  | PT D--VP-LRLF-----   |

### Supplementary Figure 8

Partial sequence alignment for ACP phosphodiesterase. The protein contains 2 aa deletion that is specific for a clade consisting of *Haemophilus influenzae*, *Haemophilus aegyptius*, *Haemophilus haemolyticus*, *Haemophilus sp. oral taxon 851*, *Haemophilus parainfluenzae*, and *Haemophilus pittmaniae*. The remaining *Haemophilus* species and other *Pasteurellales* or *Gammaproteobacteria* species (250 blasts) do not contain the CSI.



|                                                          |                                          |           | 412                | 446                  |
|----------------------------------------------------------|------------------------------------------|-----------|--------------------|----------------------|
| <i>Pasteurella<br/>sensu stricto</i>                     | Past. multocida subsp. m str. Pm70       | 15602400  | DIRSPEETDEKPLNMENV | QLMPFYKLSSQFANLDQ    |
|                                                          | Past. multocida subsp. m str. 3480       | 386834344 | -----              | -----                |
|                                                          | Past. multocida subsp. m str. P52VAC     | 401689778 | -----              | -----                |
|                                                          | Past. multocida subsp. m str. PMTB       | 544580593 | -----              | -----                |
|                                                          | Past. multocida subsp. m str. VTCCBAA264 | 544580593 | -----              | -----                |
|                                                          | Past. multocida subsp. m str. 3480       | 385201045 | -----              | -----                |
|                                                          | Past. multocida subsp. gallicida         | 385201045 | -----              | -----                |
|                                                          | Past. multocida subsp. m str. 3480       | 385201045 | -----              | -----                |
|                                                          | Past. multocida subsp. m P1062           | 557249467 | -----              | -----                |
|                                                          | Past. multocida subsp. m str. Anand1     | 338215897 | -----              | -----                |
|                                                          | Past. multocida subsp. m str. HN06       | 383310178 | -----              | -----                |
|                                                          | Past. multocida 1500C                    | 512763580 | -----              | -----                |
|                                                          | Pasteurella multocida RIIF               | 512762374 | -----              | -----                |
|                                                          | Pasteurella multocida 93002              | 512757128 | -----              | -----                |
|                                                          | Pasteurella multocida 671/ 90            | 512759585 | -----              | -----                |
|                                                          | Pasteurella multocida 36950              | 378774244 | -----              | -----                |
|                                                          | Pasteurella multocida 1500E              | 511371788 | -----              | -----                |
|                                                          | Pasteurella multocida 2000               | 512752228 | -----              | -----                |
|                                                          | Pasteurella multocida P1933              | 512756828 | -----              | -----                |
| Other<br><i>Pasteurellales</i>                           | Pasteurella dagmatis                     | 492146744 | -----N--K-D--      | K-----ST---          |
|                                                          | Pasteurella pneumotropica                | 517166719 | -----FKSDHH        | EV IQ-----SS---      |
|                                                          | Pasteurella bettyae                      | 492137292 | -----H--R-FSL-GY   | EV KHL-----ST-P-     |
|                                                          | Mannheimia succiniciproducens            | 52425117  | -----H--R-FELAGH   | EV KHL-----GD---     |
|                                                          | Actinobacillus succinogenes 13           | 152979406 | -----N--AL--R      | QV IEL----V---GE---  |
|                                                          | Avibacterium paragallinarum              | 516417163 | -----S--N--QLA-A   | KI I-----E---        |
|                                                          | Aggregatibacter segnis                   | 493769782 | -----I--N--HI--Q   | AM I-L-----E---      |
|                                                          | Aggregatibacter aphrophilus NJ           | 251792601 | -----I--N--HI--Q   | AM I-L-----G---D---  |
|                                                          | Aggregatibacter actinomycetemc           | 365967873 | -----I-----HI-KQ   | TM I-L-----N---E---  |
|                                                          | Gallibacterium anatis UMN179             | 332288104 | -----HE-E--QLD-H   | TI LHI-----T--PS---  |
|                                                          | Haemophilus somnus 129PT                 | 113461045 | -----V-D---EISGQ   | NI I-----H--E---     |
|                                                          | Haemophilus somnus 2336                  | 170717619 | -----V-D---EISGQ   | NI I-----H--E---     |
|                                                          | Actinobacillus capsulatus                | 517481949 | -----T-FSLDG-      | EV K-----S---        |
|                                                          | Actinobacillus suis H91-0380             | 407691879 | -----A-FSLDG-      | EV K-----S---        |
|                                                          | Actinobacillus pleuropneumonia           | 491785160 | -----A-FSLDG-      | EV K-----S---        |
|                                                          | Actinobacillus ureae                     | 491831251 | ----S----A-FSLDG-  | EV K-----S---        |
|                                                          | Actinobacillus minor                     | 492375229 | -----V----FSL-G-   | EV KEL-----GA---     |
|                                                          | Bibersteinia trehalosi USDA-AR           | 470166787 | -----N-FELDG-      | NV -I-----NN-GS---   |
|                                                          | Mannheimia haemolytica USDA-AR           | 472333421 | -----V----FRLDG-   | EV KEL-----ST---     |
|                                                          | Haemophilus parasuis SH0165              | 219870478 | -----V----FSL-G-   | EV KEL-----NH-G---   |
|                                                          | Haemophilus parahaemolyticus             | 491983005 | -----A--ELD--      | EV KEL-----TA---     |
|                                                          | Haemophilus paraphrohaemolytic           | 491988803 | -----A-FKL-G-      | EV KEL-----TE---     |
|                                                          | Haemophilus ducreyi 35000HP              | 33152814  | -----M-----VLAQA   | QV IEL-----T---H---  |
|                                                          | Haemophilus sputorum                     | 494789029 | -----E-S-FTL-G-    | TV KVL-----GS---     |
|                                                          | Haemophilus influenzae 86-028N           | 68250032  | -----FESGTH        | DV IQ-----GS---      |
|                                                          | Haemophilus aegyptius                    | 494053895 | -----N-FESGTH      | DV IQ-----GS---      |
|                                                          | Haemophilus sp. oral taxon 851           | 497183028 | -----N-FESDTH      | EV IQ-----GS---      |
| Other<br><i>Gammaproteo-</i><br><i>bacteria</i><br>0/250 | Candidatus Regiella insecticol           | 493756535 | ---A---QE---DLD    | PV HIL-----R---ST--- |
|                                                          | Yersinia rohdei                          | 490854420 | ---A-D-Q---KL-GI   | EV -AI-----D---      |
|                                                          | Dickeya dadantii 3937                    | 307129908 | ----D-Q--R--AL-Q-  | EI KSL-----GT--GD--- |
|                                                          | Plesiomonas shigelloides                 | 499151317 | -----EE---VL-G-    | TV TC-----T--DT---   |
|                                                          | Enterobacteriaceae bacterium s           | 440288781 | ----VD-Q-D---KV-G- | EI ASL-----T--G---   |
|                                                          | Salmonella enterica                      | 486431237 | ----VD-Q-D---KV-G- | DV VSL-----TK-GD---  |
|                                                          | Brenneria sp. EniD312                    | 496405054 | ---A-D-QE---TLAQA  | EI KSL-----T--GD---  |
|                                                          | Serratia marcescens                      | 491078757 | ----ND-QE---QL-Q-  | EV KAL-----T--GD---  |
|                                                          | Shewanella sp. W3-18-1                   | 120599623 | ---A---EEH---I-G-  | EV KRI--F--AT--D--K  |
|                                                          | Pantoea sp. GM01                         | 495162200 | ----AD-Q-A---AL-G- | EV KPLA-----T--GD--- |
|                                                          | Colwellia psychrerythraea 34H            | 71280272  | -----EED---ELGD-   | EV KHI-----T--GD---  |
|                                                          | Kosakonia radicincitans                  | 494615276 | ----ID-Q-D---KL-G- | DV VSL-----TK-GD---  |

**Supplementary Figure 9**

Partial sequence alignment for tRNA s(4)U8 sulfurtransferase. The protein contains 2 aa deletion that is specific for *Pasteurella sensu stricto*.

|                                        |                                         | 151                  | 188                   |
|----------------------------------------|-----------------------------------------|----------------------|-----------------------|
|                                        | Pasteurella multocida 36950             | DTVTVNYTGKLPNGEVFDSS | RGKPVSFKLNQVVPGWTE    |
|                                        | Past. multocida subsp. m str. HN06      | -----                | -----                 |
|                                        | Past. multocida subsp. m str. Anand1    | -----                | -----                 |
|                                        | Past. multocida subsp. m str. gallicida | -----                | -----                 |
|                                        | Past. multocida subsp. m str. Anand1    | -----                | -----                 |
|                                        | Past. multocida subsp. m str. 3480      | -----                | -----                 |
|                                        | Past. multocida subsp. m str. P52VAC    | -----                | -----                 |
|                                        | Past. multocida subsp. m str. PMTB      | -----                | -----                 |
|                                        | Past. multocida subsp. m str. P1062     | -----                | -----                 |
| <i>Pasteurella sensu stricto</i>       | Past. multocida subsp. m VTCCBAA264     | -----                | -----                 |
|                                        | Pasteurella multocida 3695              | -----                | -----                 |
|                                        | Pasteurella multocida 1500E             | -----                | -----                 |
|                                        | Pasteurella multocida 2000              | -----                | -----                 |
|                                        | Pasteurella multocida 671/ 90           | -----                | -----                 |
|                                        | Pasteurella multocida 1500C             | -----                | -----                 |
|                                        | Past. multocida subsp. m str. HB03      | -----                | -----                 |
|                                        | Pasteurella multocida 93002             | -----                | -----                 |
|                                        | Past. multocida subsp. m str. Pm70      | -----                | -----                 |
|                                        | Pasteurella dagmatis                    | ----K-V-----D---RT   | H---I-----            |
|                                        | Past. dagmatis ATCC 43325               | ----K-V-----D---RT   | H---I-----            |
|                                        | Haemophilus ducreyi                     | -I-IAH-K-T--D-T----  | YE--NE-IELQ-K-LI-A-I- |
|                                        | Haemophilus sputorum                    | --K-H-K-T-VD-S-----  | YD--Q-IE---DNLI-A-K-  |
|                                        | Bibersteinia trehalosi                  | --K-H-K-T-TD-S-----  | YE--E-IE-Q-S-LI-A-V-  |
|                                        | Gallibacterium anatis                   | --K---R---ID-TE----  | YK--NQ-IE-Q-G-LI---V- |
|                                        | Haemophilus paraphrohaemolyticus        | -V-K-H-K-T--D-T----- | YD--NA--E-Q-D-LI-A-V- |
|                                        | Haemophilus parahaemolyticus            | -M-K-H-K-T--D-T----- | YD--NA--E-Q---LI---I- |
|                                        | Actinobacillus minor                    | -I-K-H-K-T---TT----- | YD--E-IE-Q-D-LI---I-  |
| <i>Other Pasteurellales</i>            | Mannheimia haemolytica                  | --K-H-K-T-TD-T-----  | YD--E-IE-Q---LI---I-  |
|                                        | Actinobacillus capsulatus               | --K-H-K-T-TD-T-----  | YD--E-IE-Q---LI---I-  |
|                                        | Actinobacillus pleuropneumoniae         | --K-H-K-T-TD-T-----  | YD--E-IE-Q---LI---I-  |
|                                        | Actinobacillus suis                     | --K-H-K-T-TD-T-----  | YD--E-IE-Q---LI---I-  |
|                                        | Actinobacillus ureae                    | --K-H-K-T-TD-T-----  | YD--E-IE-Q---LI---I-  |
|                                        | Avibacterium paragallinarum             | -M-K-H-----AD-T----- | VQ--Q-AE-----IK----   |
|                                        | Pasteurella pneumotropica               | --K-H-----           | VE--Q-AE-R-D---K----  |
|                                        | Pasteurella bettyae                     | --K-H-----T--T-----  | VE--NQ-AE-M---I-----  |
|                                        | Actinobacillus succinogenes 13          | -S-K-H-----T-----    | VE--Q-AE-A---I-----   |
|                                        | Mannheimia succiniciproducens           | -S-K-H-----T--T----- | VE--Q--E-L-D--I-----  |
|                                        | Aggregatibacter segnis                  | -V-K-H-----D-T-----  | VQ--T-AE-P---IK----   |
|                                        | Aggregatibacter aphrophilus             | --K-H-----D-T-----   | RE--T-AE-P---IK----   |
|                                        | Aggregatibacter actinomycetemc          | -V-K-H-----D-T-----  | HE--T-AE-P---IK----   |
|                                        | Haemophilus somnus 2336                 | -R-K-H-----A--K----- | RE--Q-AE-----IL----   |
|                                        | Haemophilus somnus 129PT                | -R-K-H-----A--K----- | RE--Q-AE-----IL--K-   |
|                                        | Haemophilus sp. oral taxon 851          | --K-H-----K-----     | VE--Q--E-Q---IK----   |
|                                        | Haemophilus aegyptius                   | --K-H-----K-----     | VE--Q--E-Q-D--IK----  |
|                                        | Haemophilus parainfluenzae T3T          | --K-H-----D-K-----   | VE--Q--E-----IK----   |
|                                        | Haemophilus haemolyticus                | --K-H-----K-----     | VE--Q--E-Q-D--IK----  |
|                                        | Haemophilus influenzae 10810            | --K-H-----K-----     | VE--Q--E-Q-D--IK----  |
|                                        | Haemophilus pittmaniae                  | -V-K-H-----AD-K----- | VE--S-AE-----K-----   |
|                                        | Haemophilus parasuis SH0165             | --K-H-K-T--D-T-----  | YD--E-IE-Q---LI-A-V-  |
| <i>Other Gammaproteobacteria 0/250</i> | Legionella nagasakiensis                | -----E---R-I-----T   | EK T--A---S--I-----   |
|                                        | Marinobacter sp. ELB17                  | E-----H---E-L-----   | RE--E---R-D--I-----   |
|                                        | Acinetobacter sp. NIPH 1847             | --K-H-K-Q--D-K-----  | YD--E-IE-P---I-----   |
|                                        | Moritella sp. PE36                      | -----H---S-LD-S----- | VE--E-AT-A--R-I-----  |
|                                        | Tatlockia micdadei                      | -V---E-----ID-Q---T  | EK T--AT--VS--I-----  |
|                                        | Thalassolituus oleivorans MIL-          | -K-L-H-H-T-L--N----- | VK--E-IA-G---I-----   |
|                                        | Shewanella sp. MR-4                     | -----H-H-T-ID-T----- | VE--E-IA-P--R-I-----  |
|                                        | Psychromonas sp. CNPT3                  | ---H-H-T-LD-T-----   | VD--E-I-----IK----    |
|                                        | Idiomarina loihiensis L2TR              | -M-E-H-E-T-V-----    | YE--E-T--P--R-I-----  |
|                                        | Candidatus Legionella jeonii            | -----D---T-LD-Q---TT | EK T--AT--VS--I-----  |
|                                        | Oceanimonas sp. GK1                     | -V---H---T-VD-TQ---- | VE--E-A--P---I-----   |

**Supplementary Figure 10**

Partial sequence alignment for FKBP-type peptidyl-prolyl cis-trans isomerase. The protein contains 2 aa deletion that is specific for *Pasteurella sensu stricto*.

|  |                                              | 173       | 245                  |
|--|----------------------------------------------|-----------|----------------------|
|  | Past. multocida subsp. m str. HN06           | 383311492 | PASSILDIERKVTAKMRGDL |
|  | Past. multocida subsp. m str. Anand1_buffalo | 401692294 | PIENFGAPLAGSLIPWIDK  |
|  | Past. multocida subsp. m str. Anand1_poultry | 338218682 |                      |
|  | Past. multocida subsp. m str. Anand1_poultry | 338217898 |                      |
|  | Past. multocida subsp. m str. 3480           | 386835511 |                      |
|  | Past. multocida subsp. m str. HN06           | 380872764 |                      |
|  | Past. multocida subsp. gallicida X73         | 404381296 |                      |
|  | Past. multocida subsp. gallicida P1059       | 404381529 |                      |
|  | Past. multocida subsp. m str. VTCCBAA264     | 662150000 |                      |
|  | Past. multocida subsp. m str. PMTB           | 544579597 |                      |
|  | Past. multocida subsp. m str. PMTB           | 557250343 |                      |
|  | Past. multocida subsp. m str. HB03           | 570283089 |                      |
|  | Past. multocida subsp. m str. Pm70           | 15603497  |                      |
|  | Past. multocida subsp. m str. P52VAC         | 401688289 |                      |
|  | Pasteurella multocida 671/ 90                | 512758580 |                      |
|  | Pasteurella multocida 36950                  | 356598033 |                      |
|  | Pasteurella multocida 1500E                  | 511370980 |                      |
|  | Pasteurella multocida 93002                  | 512754838 |                      |
|  | Pasteurella multocida P1933                  | 512755327 |                      |
|  | Pasteurella multocida RIIF                   | 512761301 |                      |
|  | Pasteurella multocida 1500C                  | 512764053 |                      |
|  | Pasteurella dagmatis                         | 260632372 |                      |
|  | Pasteurella bettyae                          | 492142074 |                      |
|  | Mannheimia succiniciproducens                | 52424061  |                      |
|  | Actinobacillus succinogenes 13               | 152977962 |                      |
|  | Aggregatibacter aphrophilus NJ               | 251793382 |                      |
|  | Aggregatibacter actinomycetemc               | 491743607 |                      |
|  | Aggregatibacter segnis                       | 493771023 |                      |
|  | Gallibacterium anatis UMN179                 | 332289624 |                      |
|  | Actinobacillus suis H91-0380                 | 407691599 |                      |
|  | Actinobacillus ureae                         | 491830899 |                      |
|  | Actinobacillus pleuropneumonia               | 2494081   |                      |
|  | Actinobacillus capsulatus                    | 517480854 |                      |
|  | Haemophilus ducreyi                          | 33151282  |                      |
|  | Actinobacillus minor                         | 492378846 |                      |
|  | Haemophilus aegyptius                        | 327473112 |                      |
|  | Haemophilus somnus 2336                      | 170718618 |                      |
|  | Haemophilus somnus 129PT                     | 113461688 |                      |
|  | Haemophilus influenzae F3031                 | 319897820 |                      |
|  | Haemophilus haemolyticus                     | 491840026 |                      |
|  | Haemophilus parainfluenzae T3T               | 345429175 |                      |
|  | Haemophilus pittmaniae                       | 494451354 |                      |
|  | Haemophilus sp. oral taxon 851               | 497184927 |                      |
|  | Haemophilus parahaemolyticus                 | 491983155 |                      |
|  | Haemophilus paraphrohaemolytic               | 491991632 |                      |
|  | Haemophilus sputorum                         | 494791543 |                      |
|  | Haemophilus parasuis SH0165                  | 219871160 |                      |
|  | Mannheimia haemolytica USDA-AR               | 472334224 |                      |
|  | Bibersteinia trehalosi USDA-AR               | 470167928 |                      |
|  | Pasteurella pneumotropica                    | 517168125 |                      |
|  | Avibacterium paragallinarum                  | 516415744 |                      |
|  | Dickeya dadantii Ech586                      | 271502355 |                      |
|  | Dickeya zeae Ech1591                         | 251787870 |                      |
|  | Plesiomonas shigelloides                     | 499149527 |                      |
|  | Rahnella sp. Y9602                           | 322830931 |                      |
|  | Hafnia alvei                                 | 490192463 |                      |
|  | Yokenella regensburgei                       | 493871072 |                      |
|  | Enterobacter sp. Ag1                         | 495733328 |                      |
|  | Cronobacter malonaticus                      | 495054021 |                      |
|  | Aeromonas diversa                            | 491503773 |                      |
|  | Pantoea sp. Sc1                              | 496378765 |                      |
|  | Edwardsiella tarda EIB202                    | 269140685 |                      |
|  | Halomonas sp. TD01                           | 497409267 |                      |
|  | Escherichia coli UTI89                       | 91212916  |                      |
|  | Yersinia enterocolitica subsp.               | 332163357 |                      |

### Supplementary Figure 11

Partial sequence alignment for Aspartate-Semialdehyde Dehydrogenase. The protein contains 1 aa deletion that is specific for *Pasteurella sensu stricto*. No other species harbor this insert.



|                                      |                                             | 357       | 387                               |
|--------------------------------------|---------------------------------------------|-----------|-----------------------------------|
|                                      | Pasteurella dagmatis ATCC 43325             | 260632997 | VRIGNPLNITGVTHHV E NKPQYSTVLGLLQY |
|                                      | Pasteurella multocida 93002                 | 512756477 | -----L- -                         |
|                                      | Pasteurella multocida 1500C                 | 512763891 | -----L- -                         |
|                                      | Pasteurella multocida 1500E                 | 511371845 | -----L- -                         |
|                                      | Pasteurella multocida 2000                  | 512750732 | -----L- -                         |
|                                      | Pasteurella multocida P1933                 | 512756520 | -----L- -                         |
|                                      | Pasteurella multocida 671/ 90               | 512760522 | -----L- -                         |
|                                      | Pasteurella multocida RIIF                  | 512761903 | -----L- -                         |
|                                      | Pasteurella multocida 36950                 | 378774785 | -----L- -                         |
|                                      | Past. multocida subsp. m str. Pm70          | 15602011  | -----L- -                         |
|                                      | Past. multocida subsp. m str. HN06          | 383310759 | -----L- -                         |
|                                      | Past. multocida subsp. m str. 3480          | 386834751 | -----L- -                         |
|                                      | Past. multocida subsp. m str. P1062         | 557251138 | -----L- -                         |
| <i>Pasteurella<br/>sensu stricto</i> | Past. multocida subsp. m str. P52VAC        | 401690272 | -----L- -                         |
|                                      | Past. multocida subsp. m str. PMTB          | 544580907 | -----L- -                         |
|                                      | Past. multocida subsp. m VTCCBAA264         | 662151314 | -----L- -                         |
|                                      | Past. multocida subsp. m str Anand1_goat    | 338219119 | -----L- -                         |
|                                      | Past. multocida subsp. m str Anand1_cattle  | 01701157  | -----L- -                         |
|                                      | Past. multocida subsp. m str Anand1_buffalo | 401698941 | -----L- -                         |
|                                      | Past. multocida subsp. m str Anand1_poultry | 338216942 | -----L- -                         |
|                                      | Past. multocida subsp. m str 3480           | 385201454 | -----L- -                         |
|                                      | Past. multocida subsp.gallicida X73         | 404383534 | -----L- -                         |
|                                      | Past. multocida subsp.gallicida P1059       | 404383534 | -----L- -                         |
|                                      | Past. multocida subsp. m P1062              | 557251138 | -----L- -                         |
|                                      | Past. multocida subsp. m str. HB03          | 570282365 | -----L- -                         |
|                                      | Haemophilus aegyptius                       | 327467404 | ---AS-----L-DY- R-----V-----      |
|                                      | Avibacterium paragallinarum                 | 516416579 | ---S-M-----L-DY- -----V-----      |
|                                      | Pasteurella pneumotropica                   | 517168260 | --V-S-----L-DY- -R-----I-----     |
|                                      | Haemophilus pittmaniae                      | 494451856 | ---S-----L-DY- -R-----V-----      |
|                                      | Pasteurella bettyae                         | 492145430 | --V-Y---S-L-DY- ----A-----        |
| <i>Other<br/>Pasteurellales</i>      | Mannheimia succiniciproducens               | 52425717  | --V-Y-----L-DY- ----A-----        |
|                                      | Actinobacillus succinogenes 13              | 152979582 | --V-S-----L-DY- ----A-----        |
|                                      | Aggregatibacter actinomycetemc              | 491735876 | ---S-----L-DY- ----A-I-----       |
|                                      | Aggregatibacter segnis                      | 493768770 | ---S-----L-DY- -----I-----        |
|                                      | Aggregatibacter aphrophilus NJ              | 251792027 | --V-S-----L-DY- ----A-I-----      |
|                                      | Gallibacterium anatis UMN179                | 332288548 | -K--T-----L-DY- ----A-----        |
|                                      | Haemophilus influenzae 10810                | 378697366 | ---AS-----L-DY- -R-----V-----     |
|                                      | Haemophilus pittmaniae                      | 494451856 | ---S-----L-DY- -R-----V-----      |
|                                      | Haemophilus sp. oral taxon 851              | 497452636 | ---S-----L-DY- -R-----V-----      |
|                                      | Haemophilus haemolyticus                    | 491875401 | ---S-----L-DY- -R-----V-----      |
|                                      | Haemophilus parahaemolyticus                | 491987960 | --V-S---A-L-DY- ----A-----        |
|                                      | Haemophilus paraphrohaemolytic              | 491991888 | --V-----A-L-DY- ----A-----        |
|                                      | Haemophilus parasuis SH0165                 | 219870395 | --V-----L-DY- ---S-A-----         |
|                                      | Haemophilus sputorum                        | 494790961 | --V-----E-L-DY- ----A-----        |
|                                      | Actinobacillus pleuropneumonia              | 126207510 | --V-Y-----L-DY- ----A-----        |
|                                      | Actinobacillus ureae                        | 491831136 | --V-Y-----L-DY- ----A-----        |
|                                      | Actinobacillus suis H91-0380                | 407693004 | --V-Y-----L-DY- ----A-----        |
|                                      | Actinobacillus minor                        | 492358394 | --V-Y-----L-DY- ----A-----F-      |
|                                      | Mannheimia haemolytica USDA-AR              | 472333002 | --V-Y-----L-DY- ----A-A-----      |
|                                      | Bibersteinia trehalosi USDA-AR              | 470166543 | --V-H-----L-DY- ----A-----        |

### Supplementary Figure 13

A partial sequence alignment of the Cell division protein FtsA depicts the conserved 1 aa insertion shared by *Pasteurella sensu stricto*.

|                             |                                                    |           |                      |                             |
|-----------------------------|----------------------------------------------------|-----------|----------------------|-----------------------------|
| <i>Aggregatibacter</i>      | Aggregatibacter actinomycetemcomitans D11S-1       | 261866907 | FTGFGIGVGVGTTKYKDAK  | RISNVDLIADYGIDYGNDFVG       |
|                             | Aggregatibacter actinomycetemcomitans ANH9381      | 365966720 | -----                | -----                       |
|                             | Aggregatibacter actinomycetemcomitans D7S-1        | 387121099 | -----                | -----                       |
|                             | Aggregatibacter actinomycetemcomitans RhAA1        | 359757391 | -----                | -----                       |
|                             | Aggregatibacter actinomycetemcomitans SC1083       | 347992294 | -----                | -----                       |
|                             | Agg. actinomycetemcomitans serotype a str. A160    | 443549786 | -----                | -----                       |
|                             | Agg. actinomycetemcomitans serotype e str. SCC393  | 348003778 | -----                | -----                       |
|                             | Agg. actinomycetemcomitans serotype b str. S23A    | 443548871 | -----                | -----                       |
|                             | Agg. actinomycetemcomitans D11S-1                  | 261412239 | -----                | -----                       |
|                             | Agg. actinomycetemcomitans serotype f str. D18P1   | 348001357 | -----                | -----                       |
|                             | Agg. actinomycetemcomitans serotype a str. H5P1    | 348002279 | -----                | -----                       |
|                             | Agg. actinomycetemcomitans serotype c str. SCC2302 | 348004682 | -----                | -----                       |
|                             | Agg. actinomycetemcomitans serotype b str. SCC1398 | 348006756 | -----                | -----                       |
|                             | Agg. actinomycetemcomitans serotype b str. I23C    | 348010515 | -----                | -----                       |
|                             | Agg. actinomycetemcomitans serotype c str. D17P-2  | 348656715 | -----                | -----                       |
|                             | Agg. actinomycetemcomitans ANH9381                 | 365745633 | -----                | -----                       |
|                             | Agg. actinomycetemcomitans D7S-1                   | 385875591 | -----                | -----                       |
|                             | Agg. actinomycetemcomitans Y4                      | 429155976 | -----                | -----                       |
|                             | Agg. actinomycetemcomitans serotype c str. AAS4A   | 443542933 | -----                | -----                       |
|                             | Agg. actinomycetemcomitans serotype b str. SCC4092 | 443545908 | -----                | -----                       |
|                             | Agg. actinomycetemcomitans HK1651                  | 601111157 | -----                | -----                       |
|                             | Aggregatibacter aphrophilus NJ                     | 251793586 | ---V-D-----          | -----N---                   |
|                             | Aggregatibacter aphrophilus NJ8700                 | 247534982 | ---V-D-----          | -----N---                   |
|                             | Aggregatibacter aphrophilus ATCC 33389             | 347814960 | ---V-D-----          | -----N---                   |
|                             | Aggregatibacter aphrophilus F0387                  | 353345480 | ---V-D-----          | -----N---                   |
| <i>Other Pasteurellales</i> | Aggregatibacter segnis                             | 492001274 | ---V-----E---        | -----FNH-QNV--              |
|                             | Actinobacillus actinomycetemco                     | 19911156  | -----                | -----                       |
|                             | Actinobacillus ureae                               | 491831195 | ---V-V--DLT-V--DVDG  | VKGK QST-PA -VV---M----N-   |
|                             | Actinobacillus pleuropneumonia                     | 126207537 | ---V-V--DLT-V--VDG   | VKGK QSTGPA -VV---M---DN-   |
|                             | Actinobacillus minor                               | 492365015 | ---L-V--DLT-A---VDG  | VKGK QSTGPA -VV---M---SN--- |
|                             | Actinobacillus suis H91-0380                       | 407692976 | ---V-V--DLT-V--EVDG  | VKGK QSTGPA -VV---M----N-   |
|                             | Haemophilus sputorum                               | 494791298 | ---V-V--DLTSA---VDG  | IKGK QSTGPA -VV---M----NL-- |
|                             | Haemophilus paraphrohaemolytic                     | 491991617 | ---I-VSTDLT-A---ANG  | VTGK QSTGP- -VV---M----NL-- |
|                             | Haemophilus parahaemolyticus                       | 491987783 | ---V-VSADLT-A---VNG  | VTGK QSTGP- -VV---M----NL-- |
|                             | Haemophilus parasuis SH0165                        | 219871549 | ---G---MD-T----NGD   | LQGK QA-GIN FTL--AT---RNLI- |
|                             | Haemophilus ducreyi 35000HP                        | 33151516  | ---M---IDL-D-A--TSHG | QNGK RKA-PM IVL---M----NL-- |
|                             | Mannheimia haemolytica USDA-AR                     | 472335694 | ---I-V--D-T----VEG   | VKGK DSTGPA -VV---EQ--N---  |
|                             | Mannheimia haemolytica M42548                      | 482885642 | ---I-V--D-T----VEG   | VKGK DSTGPA -VV---EQ--N---  |
|                             | Bibersteinia trehalosi USDA-AR                     | 470167899 | ---V-V-LDLT-V---NSN  | LQGK QATGAN FVL--AL---NVL-  |
|                             | Simonsiella muelleri                               | 488718971 | ---ASV-TNIE-----IKN  | SISG ENTR-AV-KG-V-F-M--NL-- |

### Supplementary Figure 14

A 4 aa deletion in a conserved region of the Outer membrane protein specific is for *Aggregatibacter*

|                          |                                                    |           | 190               | 220              |
|--------------------------|----------------------------------------------------|-----------|-------------------|------------------|
|                          | Agg. actinomycetemcomitans ANH9381                 | 365966332 | TVILPTLARHHVNRD   | DNVKSAVDFCNTMDWG |
|                          | Agg. actinomycetemcomitans D7S-1                   | 387121526 | -----             | -----            |
|                          | Agg. actinomycetemcomitans serotype b str. I23C    | 348008395 | -----             | -----            |
|                          | Agg. actinomycetemcomitans serotype b str. S23A    | 443544851 | -----             | -----            |
|                          | Agg. actinomycetemcomitans serotype b str. SCC1398 | 348006394 | -----             | -----            |
|                          | Agg. actinomycetemcomitans serotype b str. A160    | 443550283 | -----             | -----            |
|                          | Agg. actinomycetemcomitans Y4                      | 429154918 | -----             | -----            |
|                          | Agg. actinomycetemcomitans HK1651                  | 601113024 | -----             | -----            |
|                          | Agg. actinomycetemcomitans serotype b str. SCC4092 | 443547650 | -----             | -----            |
|                          | Agg. actinomycetemcomitans serotype c str. SCC2302 | 348007426 | -----             | -----            |
|                          | Agg. actinomycetemcomitans serotype c str. D17P-2  | 348656671 | -----             | -----            |
| Aggregatibacter          | Agg. actinomycetemcomitans serotype c str. AAS4A   | 443541805 | -----             | -----            |
|                          | Agg. actinomycetemcomitans serotype d str. I63B    | 347996801 | -----             | -----            |
|                          | Agg. actinomycetemcomitans serotype d str. H5P1    | 347997479 | -----             | -----            |
|                          | Agg. actinomycetemcomitans serotype d str. D18P1   | 348002902 | -----             | -----            |
|                          | Agg. actinomycetemcomitans serotype d str. SCC393  | 348003239 | -----             | -----            |
|                          | Agg. actinomycetemcomitans serotype d str. D17P-3  | 348656236 | -----             | -----            |
|                          | Agg. actinomycetemcomitans serotype d str. D7S-1   | 385876018 | -----             | -----            |
|                          | Agg. actinomycetemcomitans D11S-1                  | 261868574 | -----Y----        | -----            |
|                          | Aggregatibacter aphrophilus NJ                     | 251794002 | -----             | --A-----R-----   |
|                          | Aggregatibacter aphrophilus ATCC 33389             | 347813475 | -----             | --A-----R-----   |
|                          | Aggregatibacter aphrophilus NJ8700                 | 247535401 | -----             | --A-----R-----   |
|                          | Aggregatibacter aphrophilus F0387                  | 353345600 | -----             | --A-----R-----   |
|                          | Aggregatibacter segnis                             | 493770776 | -----             | --A-----R-----   |
|                          | Aggregatibacter segnis ATCC 33393                  | 315476479 | -----             | --A-----R-----   |
|                          | Haemophilus sp. oral taxon 851                     | 497182424 | -----E G          | -SA-----R-----   |
|                          | Haemophilus aegyptius                              | 494053515 | -----E G          | -SA-----R-----   |
|                          | Haemophilus influenzae 86-028N                     | 68249552  | -----E G          | -SA-----R-----   |
|                          | Haemophilus parainfluenzae T3T                     | 345428924 | -----E D          | NSSQ-----RD----- |
|                          | Haemophilus haemolyticus                           | 491853634 | -----E G          | -SD-----R-----   |
|                          | Haemophilus pittmaniae                             | 494452657 | -----T D          | -AEQ-GQ--HQ----- |
|                          | Avibacterium paragallinarum                        | 516416005 | -----S D          | NAEQ-----R-----  |
|                          | Haemophilus somnus 129PT                           | 113460561 | -----S--Y--T D    | NIE-----RQ-----  |
|                          | Haemophilus somnus 2336                            | 170718908 | -----S--Y--T D    | NIE-----RQ-----  |
|                          | Pasteurella pneumotropica                          | 517167578 | -----E D          | NSEQ-----R-----  |
|                          | Pasteurella dagmatis                               | 492150466 | -----S-H D        | NSAQ-E---R--L--- |
|                          | Pasteurella multocida subsp. m                     | 15603525  | -----H D          | HSSQ--I--RH-L--- |
| Others<br>Pasteurellales | Pasteurella bettyae                                | 492138635 | -----S-----S D    | -A---SE--RS----- |
|                          | Actinobacillus succinogenes                        | 501021160 | -----Q-ADCT D     | NAAQGV--RQ-----  |
|                          | Mannheimia succiniciproducens                      | 52425810  | -----S-Q-----A D  | -VQ---A--RA----- |
|                          | Mannheimia haemolytica USDA-AR                     | 472332644 | --V--S-S-IAK-KE L | TEIQRGHE-Q-----  |
|                          | Bibersteinia trehalosi USDA-AR                     | 470166263 | -----A-S-IAKQKT L | SDEQRIQQ-KQ----- |
|                          | Actinobacillus capsulatus                          | 517482124 | --V--S-S-IAKKKE I | -E-QR--E-QG-V--- |
|                          | Actinobacillus pleuropneumonia                     | 491797892 | --V--S-S-IAKKKE I | -E-QR--E-QG----- |
|                          | Actinobacillus ureae                               | 491836958 | --V--S-S-IAKKKE I | -EAQR--E-QG----- |
|                          | Actinobacillus suis H91-0380                       | 407693304 | --V--S-S-IAKKKE I | -DAQR--E-QG----- |
|                          | Actinobacillus minor                               | 492353241 | --V---S-IAKKK- I  | -DNQRK-E-QS----- |
|                          | Haemophilus parasuis SH0165                        | 219871503 | -----S-S-IAKQK- L | TEEQRKFN-EQ----- |
|                          | Haemophilus ducreyi 35000HP                        | 33152962  | --V--N-S-ITKKA L  | NEEQR-IA-KQ-L--- |
|                          | Haemophilus paraphrohaemolytic                     | 491988454 | --V---SKI AKQKE L | NETERKTQ-QT----- |
|                          | Haemophilus paraahaemolyticus                      | 491985107 | --V---SKI AKQKA L | NETARQAQ-QT----- |
|                          | Haemophilus sputorum                               | 494790245 | --V---SKI AKQK- L | AETQRRE--Q--L--- |

Supplementary Figure 15

A 1 aa deletion in a conserved region of the Multidrug Transporter MurJ protein, specific *Aggregatibacter* is shown in the figure.

|                 |                                                   |           |                        |                      |
|-----------------|---------------------------------------------------|-----------|------------------------|----------------------|
|                 |                                                   |           | 372                    | 412                  |
|                 | (Agg. Actinomycetemcomitans D7S-1                 | 387120244 | GSLVSLSEFTAFGALSGKITGG | S SMTIEGKIAQWVYVSLYR |
|                 | Agg. Actinomycetemcomitans HK1651                 | 601112307 | -----                  | -----                |
|                 | Agg. Actinomycetemcomitans D17P-3                 | 348655454 | -----                  | -----                |
|                 | Agg. Actinomycetemcomitans Y4                     | 429152231 | -----                  | -----                |
|                 | Agg. Actinomycetemcomitans RhAA1                  | 359757161 | -----                  | -----                |
|                 | Agg. Actinomycetemcomitans ANH9381                | 365967736 | -----                  | -----                |
|                 | Agg. Actinomycetemcomitans D11S-1                 | 261867944 | -----                  | -----                |
| Aggregatibacter | Agg. Actinomycetemcomitans erotype e str. SCC393  | 387120244 | -----                  | -----                |
|                 | Agg. Actinomycetemcomitans erotype e str. SCC1398 | 348006243 | -----                  | -----                |
|                 | Agg. Actinomycetemcomitans erotype e str. AAS4A   | 443541389 | -----                  | -----                |
|                 | Agg. Actinomycetemcomitans erotype e str. SCC4092 | 443547308 | -----                  | -----                |
|                 | Agg. Actinomycetemcomitans erotype e str. SC1083  | 347993017 | -----                  | -----                |
|                 | Agg. Actinomycetemcomitans erotype f str. D18P1   | 348000420 | -----                  | -----                |
|                 | Agg. Actinomycetemcomitans erotype d str. I63B    | 347997013 | -----                  | -----                |
|                 | Aggregatibacter segnis                            | 493769445 | -----G-----            | -----M-----          |
|                 | Haemophilus haemolyticus                          | 491870682 | -T----S---L-SI-N-FGKN  | PL-VQ--F--FA-----    |
|                 | Haemophilus sp. oral taxon 851                    | 497182862 | -T----S---L-SI-N-FGKN  | PL-VQ--F--FA-----    |
|                 | Haemophilus parainfluenzae T3T                    | 345429510 | -T----S---L-SI-N-FGKN  | PL-VQ--F--FA-----    |
| Other           | Haemophilus influenzae R2846                      | 386266521 | -T----N---L-S-TN-FGKN  | PL-VQ--F--FA-----    |
| Pasteurellales  | Haemophilus influenzae Rd KW20                    | 16272688  | -T----N---L-S-TN-FGKN  | PL-VQ--F--FA-----    |
|                 | Haemophilus influenzae 10810                      | 378696947 | -T----N---L-S-TN-FGKN  | PL-VQ--F--FA-----    |
|                 | Haemophilus influenzae F3031                      | 319897753 | -T----N---L-S-TN-FGKN  | PL-VQ--F--FA-----    |
|                 | Edwardsiella tarda EIB202                         | 269139415 | -----STV-S-M-NL-R-     | --M---R--RIM-----    |
|                 | Citrobacter freundii                              | 489928937 | -----N-STV-S-M-NL-R-   | --MV--R--RF--I----   |
|                 | Aliivibrio salmonicida LFI1238                    | 209694845 | -----N-STV-S-M-NL-K-   | --M---R--RI--I----   |
|                 | Escherichia coli                                  | 485787518 | -----N-STV-S-M-NL-R-   | --M---R--RF--I----   |
|                 | Shigella boydii                                   | 491148521 | -----N-STV-S-M-NL-R-   | --M---R--RF--I----   |
| Other           | Hahella chejuensis KCTC 2396                      | 83649253  | -----RYSTV-N-M-NL--K   | --M---R--RF--I----   |
| Gammaproteo-    | Photobacterium damsela                            | 491441018 | -----R-STV-S-M-NL-K-   | --MV--R--RV--I----   |
| bacteria        | Brenneria sp. EniD312                             | 496403366 | -----K-STV-S-M-NLMS-   | -VM---R--RF--I----   |
| 0/250           | Salmonella enterica subsp. ent                    | 197362727 | -----N-STV-S-M-NL-R-   | --M---R--RFL-I----   |
|                 | Cronobacter sakazakii                             | 495164111 | -----K-STV-S-M-NLMR-   | --M---R--RF--I----   |
|                 | Serratia sp. M24T3                                | 497321568 | -----R-STV-S-M-NL-K-   | --M---RL-RM-----     |
|                 | Vibrio mimicus                                    | 491666772 | -----R-STV-S-M-NL-R-   | --MV--R--RV--I----   |
|                 | Erythrobacter sp. NAP1                            | 494285496 | ---I---R-STV-S-M-NLV-- | A-AV--R--RFI-T----   |

### Supplementary Figure 16

Partial sequence alignment of NADH dehydrogenase, showing the presence of 1 aa insertion that is specific for *Aggregatibacter*. The homologue of this is protein or the sequence of the region containing insertion is found to be missing in *Aggregatibacter aphrophilus*



|                                 |                                      |           |                         |                                    |
|---------------------------------|--------------------------------------|-----------|-------------------------|------------------------------------|
|                                 |                                      |           | 418                     | 473                                |
| Mannheimia                      | Mannheimia haemolytica USDA-AR       | 472333011 | TDDNPRTEQKIMADIVKGFSP   | QQI IHNREEAIKTAIEQAKATDVILIAGKGHE  |
|                                 | M. haemolytica USDA-ARS-USMARC-185   | 472337351 | -----                   | -----                              |
|                                 | Mannheimia haemolytica D174          | 525663559 | -----                   | -----                              |
|                                 | Mannheimia haemolytica D171          | 523431845 | -----                   | -----                              |
|                                 | Mannheimia haemolytica PHL213        | 153094058 | -----                   | -----                              |
|                                 | Mannheimia haemolytica M42548        | 481063369 | -----                   | -----                              |
|                                 | Mannheimia haemolytica D193          | 528878678 | -----                   | -----                              |
|                                 | Mannheimia haemolytica USMARC_2286   | 526469516 | -----                   | -----                              |
|                                 | M. haemolytica USDA-ARS-USMARC-185   | 472261588 | -----                   | -----                              |
|                                 | Mannheimia haemolytica M42548        | 481063369 | -----                   | -----                              |
|                                 | Mannheimia haemolytica D153          | 523447566 | -----                   | -----                              |
|                                 | Mannheimia haemolytica D38           | 528825629 | -----                   | -----                              |
|                                 | Mannheimia haemolytica D35           | 528823205 | -----                   | -----                              |
|                                 | Mannheimia haemolytica MhBrain2012   | 528878382 | -----                   | -----                              |
|                                 | Mannheimia haemolytica MhSwine2000   | 528876521 | -----                   | -----                              |
|                                 | M. haemolytica ser. A2 str. OVINE    | 261308490 | -----                   | -----                              |
|                                 | M. haemolytica ser. A2 str. BOVINE   | 261310843 | -----                   | -----                              |
|                                 | M. haemolytica ser. 6 str. H23       | 452086134 | -----                   | -----                              |
|                                 | M. varigena USDA-ARS-USMARC-1312     | 575446106 | -----                   | -----A-T-Q-----                    |
|                                 | M. varigena USDA-ARS-USMARC-1296     | 575444080 | -----                   | -----A-T-Q-----                    |
|                                 | M. varigena USDA-ARS-USMARC-1388     | 575446833 | -----                   | -----A-T-Q-----                    |
|                                 | M. haemolytica ser. A1/A6 str. PKL10 | 589591032 | -----ES- TA             | -----D-----                        |
|                                 | M. varigena USDA-ARS-USMARC-1261     | 575440375 | -----ENQ SA             | -----V-----SI-----                 |
|                                 | Mannheimia granulomatis              | 652755953 | -----N-----             | -----QT V-----S-----               |
|                                 | Haemophilus aegyptius                | 494054439 | -K-----SQSQ-ET--A--KNM  | EK VG--PD-AQ--QF--S-VEN-----       |
|                                 | Haemophilus pittmaniae               | 494451972 | -M-----PI--E--LA-VGDR   | NT VAL-T--QD--EF-VGG-IEE-----      |
|                                 | Pasteurella pneumotropica            | 517168269 | -T-----PD--E--A--DM     | DK VGL-SD-AQ--EF--QS-QKN-L-----    |
|                                 | Actinobacillus capsulatus            | 517480314 | -----T-----L--VQV       | EK V-V--D--Q--S--G-K-----          |
|                                 | Haemophilus influenzae               | 543952514 | -K-----SQNQ-E--A--KNM   | EK VG--PD-AQ--QF--S-VEN-----       |
|                                 | Haemophilus sp. oral taxon 851       | 497452628 | -K-----SQSQ-ES--A--KNM  | DK VG--PD--Q--QF--S-VEN-----       |
|                                 | Gallibacterium anatis                | 332288557 | -----AAA-IN--Q-LDF-     | NN AT--Q-KQ-LVY-FAC-N-N--V-----    |
|                                 | Haemophilus haemolyticus             | 491854538 | -K-----SQSQ-E--A--KNM   | DK VG--PD--Q--QF--S-VEN-----       |
|                                 | Avibacterium paragallinarum          | 523673909 | -----PAA--Q--QA--ENV    | DK VA--Q-DF--RY-LSL-QPR--V-----    |
|                                 | Bibersteinia trehalosi USDA-AR       | 470166531 | -----PDV-F--MQ--H--     | KA V-TM-I-QY--EQ--SPK--V-----      |
|                                 | Haemophilus parasuis SH0165          | 219870386 | -----PDV-FN-VM--R--     | KA V-SM-I-QY--EQ--A--EPK-----      |
|                                 | Haemophilus paraphrohaemolytic       | 491991723 | -----L--ENV             | GV V-V--D--Q--L--PQ-----           |
|                                 | Haemophilus parahaemolyticus         | 491987869 | -----V-L--ENV           | DV V-V--D--Q--T-L--PQ-----         |
|                                 | Haemophilus sputorum                 | 494790980 | -----L--ENV             | GI V-V--D--Q--L--PQ-----           |
| Other Pasteurellales            | Haemophilus ducreyi 35000HP          | 33151486  | -N-----OH--V-E-MQ--A--  | DN ILV-YD--Q--OH--KH-SSA-L-----    |
|                                 | Actinobacillus suis H91-0380         | 407693013 | -----T-----L--VQV       | EK V-V--D--Q--G-K-----             |
|                                 | Actinobacillus pleuropneumonia       | 491794283 | -----A--L--VQV          | EK V-V--D--Q--NEK-----             |
|                                 | Actinobacillus ureae                 | 491831120 | -----T--N-L--VQV        | EK V-V--D--Q--NEK-----             |
|                                 | Actinobacillus minor                 | 492350031 | -----PDV-FN--M--R--     | KA V-SM-I-QY--EQ--A--EPK-----      |
|                                 | Actinobacillus succinogenes 13       | 152979591 | -----PE--V--TA--ARL     | KN V--A--A--CA--QS-AEN-----        |
|                                 | Mannheimia succiniciproducens        | 52425727  | -----RHQ-VQ--A--KR-     | ES VN-VYD--Q--R--VQS-VEN-----      |
|                                 | Pasteurella bettyae                  | 492145494 | -----HH--Q--V--KQ-      | EQ IKV--D--Q--VQS-VEN-----         |
|                                 | Pasteurella dagmatis                 | 492155823 | -----AAE--Q--LL--EDQ    | SA VK-L-D--Q--AF--DPE-T-----       |
|                                 | Pasteurella multocida subsp. m       | 383310768 | -----SAAQ-VQ--LA--EH-   | QH VEVC-A-DQ--IQ-LQK-DSD--V-----   |
|                                 | Pasteurella multocida 36950          | 378774794 | -----SAAQ-VQ--LA--EH-   | QH VEVC-A-DQ--IQ-LQK-DSD--V-----   |
|                                 | Aggregatibacter segnis               | 493768749 | -----HTQ--L--IH-        | QA V-V--Q--A--QS-VEN-----          |
|                                 | Aggregatibacter aphrophilus NJ       | 251792018 | -----HTQ--L--IN-        | QA V-V--Q--A--KS-VEN-----          |
|                                 | Aggregatibacter actinomycetemc       | 491744776 | -N----M-EPT-----LT--VH- | QR V-V--Q--Q--A--KS-VEN-----       |
|                                 | Haemophilus somnus 129PT             | 113460499 | -----NPEQ--Q--LT--QQS   | SA V--Q--Q--LQS-VEN--V-----        |
| Other Gammaproteobacteria 0/250 | Haemophilus somnus 2336              | 170718778 | -----NPEQ--Q--LT--QQS   | SA V--Q--Q--LQS-VEN--V-----        |
|                                 | Haemophilus parainfluenzae T3T       | 345429820 | -Q-----PN--E--LT--RM    | ED VGV-PD-----FT--N-VEN--V-----    |
|                                 | Thiomicrospira crunogena XCL-2       | 78484908  | -----LPDA-V--K--MHRS    | --VHV-V-D-P--AF--KK-SSH-IVV-----   |
|                                 | Cellvibrio japonicus Ueda107         | 192360758 | -N----S--PAR-A--R-LNN-  | NG CLVLAD-AQ--DF-VQ--PG-LV-----    |
|                                 | Francisella philomiragia             | 490415713 | -E--N-F-SIES-FD--K--H-  | DK HTF-DS-----YT--NS--N--L-----    |
|                                 | Vibrio mimicus                       | 491665840 | -----S-SP-A-V--MLA-LTH- | EL AH-E--FQ-ASY-LQN-G-Q-I--L-----  |
|                                 | Rahnella sp. Y9602                   | 322834425 | -----S-EPRA-V--LA-LLDA  | GR V-E--G-A--VTS--M--ED--V-----    |
|                                 | Aeromonas veronii                    | 491498935 | -----EPAR-----M-A-LRD-  | AA V-VE-D-VK--VL-TG--SKQ-I--V----- |
|                                 | Pseudomonas sp. GM84                 | 495372865 | -----P-G-F--RP--A--     | AD VDFVAG-GQ--AQL-AS-A-D--VL-----  |
|                                 | Cronobacter universalis              | 494980781 | -----PKA-I--LT-MLDA     | GR ARVVEG-A--VTN--M--AEN--V-L----- |
|                                 | Dickeya zeae Ech1591                 | 251788245 | -----S--P-A-VT--LS-LLDA | GR V-V-AG-A--VTS-VM--A-D--V-V----- |
|                                 | Xanthomonas campestris pv. cam       | 21230195  | -----G--GDV-V--LR--AR-  | DA AIVQRD-AA--HQ--SM-G-D-IV-----   |
|                                 | Hafnia alvei                         | 490196006 | -----S-EPRS-----LN-MLDA | GH A-A-SG-A--VTG--M--PD--V-----    |
|                                 | Vibrio sp. HENC-03                   | 497393525 | -----S--PAL--K-MLA-LT-- | AE AIVQ-D-FK-LSY-L-H-SSQ-I--L----- |
|                                 | Salmonella enterica                  | 486331335 | -----EPRA-IN--LA-MLDA   | GQ VRVMEG-A--VTN--M--DN--V-----    |

Supplementary Figure 17

Partial sequence alignment for UDP-N-acetylmuramoylalanine-D-glutamate--2,6-diaminopimelate ligase. The protein contains 2 aa deletion that is specific for *Mannheimia* is shown in the figure. *Mannheimia haemolytica* ser. A1/A6 str. PKL10 and *Mannheimia varigena* USDA-ARS-USMARC-1261 lacks this insert.

|                                           |                                           |           | 504            | 531              |
|-------------------------------------------|-------------------------------------------|-----------|----------------|------------------|
| <i>Mannheimia</i>                         | Mannheimia haemolytica USDA-AR            | 472333189 | RTYDRQSAVDLVK  | K HHVDYHIRETFESA |
|                                           | Mannheimia haemolytica D174               | 525663396 | -----          | -----            |
|                                           | Mannheimia haemolytica D171               | 523431632 | -----          | -----            |
|                                           | Mannheimia haemolytica D153               | 525702078 | -----          | -----            |
|                                           | Mannheimia haemolytica D35                | 528823164 | -----          | -----            |
|                                           | Mannheimia haemolytica USMARC_2286        | 526469350 | -----          | -----            |
|                                           | Mannheimia haemolytica D38                | 528826710 | -----          | -----            |
|                                           | Mannheimia haemolytica D193               | 528879592 | -----          | -----            |
|                                           | Mannheimia haemolytica USMARC_2286        | 526469350 | -----          | -----            |
|                                           | Mannheimia haemolytica M42548             | 482887395 | -----          | -----            |
|                                           | M. haemolytica USDA-ARS-USMARC-185        | 472261405 | -----          | -----            |
|                                           | M. haemolytica serotype 6 str. H23        | 452085964 | -----          | -----            |
|                                           | M. haemolytica M42548                     | 481065996 | -----          | -----            |
|                                           | M. haemolytica serotype A1/ A6 str. PKL10 | 589590286 | -----          | -----            |
|                                           | M. haemolytica serotype A2 str. OVINE     | 261307780 | -----          | -----            |
| <i>Other Pasteurellales</i>               | Mannheimia granulomatis                   | 652757696 | -----A-----    | -----YV-----     |
|                                           | Bibersteinia trehalosi USDA-AR            | 470167741 | ----R--K-L-    | Q-I-FQV-----     |
|                                           | Haemophilus parasuis SH0165               | 219871186 | -S---FNT-N-I-  | ----QV-----      |
|                                           | Haemophilus ducreyi 35000HP               | 33151802  | ----Y--IQ-T-   | L---FQ-----      |
|                                           | Haemophilus sputorum                      | 494789674 | -----TT-G-I-   | QD-NFIV-----     |
|                                           | Haemophilus parahaemolyticus              | 491988280 | -----TT-S-I-   | QD--FIV-----     |
|                                           | Haemophilus paraphrohaemolytic            | 491992094 | -----TT-S-I-   | QD--FIV-----     |
|                                           | Actinobacillus suis H91-0380              | 407691804 | ----H--IE-T-   | R---FQ-----      |
|                                           | Actinobacillus ureae                      | 491835981 | ----H--IE-T-   | L---FQT-----     |
|                                           | Actinobacillus pleuropneumonia            | 491785098 | ----H--IE-T-   | L---FQ---L---    |
|                                           | Haemophilus pittmaniae                    | 494450521 | ----RT--E-I-   | YD--FIV-----     |
|                                           | Haemophilus parainfluenzae T3T            | 345429902 | ----RTT-N-I-   | QD--FIV-----     |
|                                           | Haemophilus sp. oral taxon 851            | 497182364 | ----KTT-S-I-   | QD--FIV-----     |
|                                           | Haemophilus influenzae 86-028N            | 68249497  | ----KTT-S-I-   | QD--FIV-----     |
|                                           | Acinetobacter junii                       | 491093379 | -S---EHS LH--- | -N--M-----       |
| <i>Other Gammaproteobacteria</i><br>0/250 | Acinetobacter ursingii                    | 491131668 | -S---EHS L---  | KD--Q-----       |
|                                           | Xanthomonas sacchari                      | 498028753 | -S---EH-LE-IA  | AG-----          |
|                                           | Acinetobacter sp. CIP 70.18               | 491344899 | -S---EHS LY--- | -K--M-----       |
|                                           | Pseudomonas mendocina                     | 489337704 | -AF--EH-LE---  | -DA--IV-----     |
|                                           | Pseudomonas stutzeri ATCC 1758            | 339494315 | -AF--EH-LE---  | -DA--IV-----     |
|                                           | Pseudoxanthomonas spadix BD-a5            | 357417720 | -SF--EH-LQ---  | AG--Q-----       |
|                                           | Xanthomonas axonopodis pv. cit            | 21243026  | -S---HSLQ--A   | AG--Q-----       |
|                                           | Xanthomonas campestris pv. ves            | 78048045  | -S---HSLQ--A   | AG--Q-----       |
|                                           | Pseudomonas putida KT2440                 | 26990029  | -AF--EH-LE---  | -DA--IV-----S    |
|                                           | Serratia plymuthica                       | 493362897 | -AH--EH-IE-I-  | AN--QV-V-----    |
|                                           | Alcanivorax pacificus                     | 496012633 | -A---RH-LT-IR  | DD--FLV-----     |

**Supplementary Figure 18**

Partial sequence alignment for Glutathione-regulated potassium-efflux system protein is shown in figure. The protein contains 1 aa insertion that is specific for *Mannheimia*.

|                                                          |                                       | 214       | 252                                          |
|----------------------------------------------------------|---------------------------------------|-----------|----------------------------------------------|
| <i>Mannheimia</i>                                        | Mannheimia haemolytica USDA-AR        | 472334521 | FNKILNSEVIQAAIAEEAKKS                        |
|                                                          | Mannheimia haemolytica D35            | 528823843 | -----                                        |
|                                                          | Mannheimia haemolytica D193           | 528871831 | -----                                        |
|                                                          | Mannheimia haemolytica M42548         | 482885978 | -----                                        |
|                                                          | Mannheimia haemolytica D174           | 525664688 | -----                                        |
|                                                          | Mannheimia haemolytica D171           | 525657694 | -----                                        |
|                                                          | Mannheimia haemolytica D153           | 525703384 | -----                                        |
|                                                          | Mannheimia haemolytica USMARC_2286    | 526468127 | -----                                        |
|                                                          | Mannheimia haemolytica PHL213         | 153094325 | -----                                        |
|                                                          | Mannheimia haemolytica D38            | 528824437 | -----                                        |
|                                                          | M. haemolytica Ser. A1/ A6 str. PKL10 | 589590824 | -----                                        |
|                                                          | M. haemolytica ser. A2 str. BOVINE    | 261310643 | -----                                        |
|                                                          | M. haemolytica ser. 6 str. H23        | 452086460 | -----                                        |
|                                                          | M. haemolytica USDA-ARS-USMARC-183    | 472258758 | -----                                        |
|                                                          | M. haemolytica USDA-ARS-USMARC-185    | 472260218 | -----                                        |
|                                                          | M. haemolytica MhSwine2000            | 528873636 | -----                                        |
|                                                          | M. haemolytica MhBrain2012            | 528877526 | -----                                        |
|                                                          | M. varigena USDA-ARS-USMARC-183       | 472334521 | -----                                        |
|                                                          | M. varigena USDA-ARS-USMARC-185       | 472335981 | -----                                        |
|                                                          | M. varigena USDA-ARS-USMARC-1261      | 575441602 | -----                                        |
|                                                          | M. varigena USDA-ARS-USMARC-1312      | 575445157 | -----                                        |
|                                                          | M. varigena USDA-ARS-USMARC-1388      | 575447863 | -----                                        |
|                                                          | M. varigena USDA-ARS-USMARC-1296      | 575443019 | -----L-----H-----                            |
|                                                          | Mannheimia granulomatis               | 652756314 | -----                                        |
| Other<br><i>Pasteurellales</i>                           | Haemophilus ducreyi                   | 33151743  | -D-LIQLPT-VQ--ED---TK KI PIP---Q-----LD----  |
|                                                          | Avibacterium paragallinarum           | 516417625 | ---L-QLPT-LK--ED---SK KI PL---H---Y---LD---- |
|                                                          | Actinobacillus capsulatus             | 517482099 | L--LIQLPT-VQ--ED---SK KI -K---QQ-----LD----  |
|                                                          | Pasteurella pneumotropica             | 517166617 | ---L-Q-AP-----DD---SK NI -R---Q---Y---LD---- |
|                                                          | Bibersteinia trehalosi USDA-AR        | 470167473 | ---L-Q-PA-L---ED---P KS -----MD----          |
|                                                          | Haemophilus parasuis SH0165           | 219870296 | ---L-Q-PA-L---ED---P KS -L-----LD----        |
|                                                          | Haemophilus sputorum                  | 494789007 | ---L-D-AALKK---D--ENK KI -----Q-----LE----   |
|                                                          | Haemophilus parahaemolyticus          | 491986948 | ---L-D---LKK---D--ENK KI PL----A--T-MLD----  |
|                                                          | Haemophilus paraphrohaemolytic        | 491989884 | ---L-D-D-LKK---D--ENK KI PL----A--A-MLD----  |
|                                                          | Actinobacillus minor                  | 492357411 | ---L-D---LKK---D--ESK KI -----Q-----L-----   |
|                                                          | Actinobacillus pleuropneumonia        | 190150433 | ---IQ-PA-K---E---TK KI -I---Q-----V-----     |
|                                                          | Actinobacillus ureae                  | 491831417 | ---LIQLSA-VQ--ED---SK KI -K---QQ-----LD----  |
|                                                          | Actinobacillus suis H91-0380          | 407692764 | ---LIQLPA-VQ--ED---SK KI -K---QQ-----LD----  |
|                                                          | Actinobacillus succinogenes 13        | 152979421 | ---L-QHPAVLQ--ED--RGK NM TK-----L-----       |
|                                                          | Mannheimia succiniciproducens         | 52306852  | ---L-Q-P--LS---D---SK NM -R-R-HQ-----LK----  |
|                                                          | Pasteurella bettyae                   | 492142581 | ---L-Q-P--LE---D---SK NM -QAR--Q-----LK----  |
|                                                          | Pasteurella dagmatis                  | 492155126 | ---L-V-SA-LD--KD--AK NI -E---TQ--K--LE----   |
|                                                          | Pasteurella multocida subsp. m        | 383311863 | ---L-V-PT-LD--QD--AK NI -E---TQ--K--LD----   |
|                                                          | Gallibacterium anatis UMN179          | 332288840 | -A-L--N-K-IK---D--ENK KI -----Q-----LQ----   |
|                                                          | Aggregatibacter actinomycetemc        | 365966896 | ---L-QQP--L--ED---SK SI -V-----LD----        |
|                                                          | Aggregatibacter segnis                | 493768272 | ---L-QLP--L--ED---SK NI -R---H-----LD----    |
|                                                          | Haemophilus somnus 129PT              | 113460531 | ---L-Q-PA-LN---D---SK RI -K-----Y---LD----   |
|                                                          | Haemophilus aegyptius                 | 494053302 | ---L-Q--A-RR--ED---SK NI -I---Q---Y---LD---- |
|                                                          | Haemophilus influenzae 10810          | 378696948 | ---L-Q--A-RR--ED---SK NI -I---Q---Y---LD---- |
|                                                          | Haemophilus influenzae F3047          | 319775311 | ---L-Q--A-RR--ED---SK NI -I---Q---Y---LD---- |
| Other<br><i>Gammaproteo-</i><br><i>bacteria</i><br>0/250 | Morganella morganii subsp. mor        | 455737880 | ---L-K-KA-EK-VED--AK KI TI---QNVSM--V--      |
|                                                          | Xenorhabdus nematophila               | 498913621 | -K-L-A-KA-EK---D-VRSK KI --D--KQN-INMLE----  |
|                                                          | Brenneria sp. EniD312                 | 496405590 | ---L---KA-KK--DD--RSK KL -H-R-QQN-IALME----  |
|                                                          | Rahnella sp. Y9602                    | 322834784 | ---L-A-KA-EK--ED--RSK KI -H---QQN-IALME----  |
|                                                          | Sodalis glossinidius str. 'mor        | 85060120  | ---L-A-KA-EK-VED--RSK KI -V---QQN-IELME----  |
|                                                          | Alteromonas macleodii str. 'Bl        | 407701965 | -SV-G-DAVRR-----SRSK KV -H---KET-QSY-T----   |
|                                                          | Hafnia alvei                          | 490196787 | ---L-S-KA-EK-VED--RSK KI -R---QQN-VALME----  |
|                                                          | Yersinia enterocolitica subsp.        | 386310208 | -K-L-T-KA-EK-V-D--RTK KI -H---QQN-ITLME----  |
|                                                          | Vibrio parahaemolyticus               | 491619082 | -KRLMK--A-EQ--LD--NSK DI PI-----HA-MD----    |
|                                                          | Escherichia coli                      | 485767479 | ---L-A-RA-AK-VED--RSK KI -H---QQN-IALME----  |
|                                                          | Salmonella enterica                   | 486386721 | ---L-A-KA-AR-VED--RSK KI -H---QQN-IALME----  |
|                                                          | Shimwellia blattae DSM 4481 =         | 387890936 | ---L-A-KA-AK-VED--RSK KI -H---QQN-VALME----  |

Supplementary Figure 19

A 2 aa deletion in a partial sequence alignment of the Glycerol-3-phosphate acyltransferase protein specific for *Mannheimia* is depicted in the figure.
